# Supplementary material for: Association between vomiting in the first trimester and preterm birth: a retrospective birth cohort study in Wuhan, China
Source: PubMed Central journal article supplement — BMJ Open. 2017 Sep 27;7(9):e017309. doi: 10.1136/bmjopen-2017-017309 (PMC5623485; doi:10.1136/bmjopen-2017-017309), 2017-09-27
Supplement: bmjopen-2017-017309.draft_revisions.pdf [file bmjopen-2017-017309.draft_revisions.pdf]

# BMJ Open

BMJ Open is committed to open peer review. As part of this commitment we make the peer review history of every article we publish publicly available.

When an article is published we post the peer reviewers' comments and the authors' responses online. We also post the versions of the paper that were used during peer review. These are the versions that the peer review comments apply to.

The versions of the paper that follow are the versions that were submitted during the peer review process. They are not the versions of record or the final published versions. They should not be cited or distributed as the published version of this manuscript.

BMJ Open is an open access journal and the full, final, typeset and author-corrected version of record of the manuscript is available on our site with no access controls, subscription charges or pay-per-view fees (<http://bmjopen.bmj.com>).

If you have any questions on BMJ Open's open peer review process please email [editorial.bmjopen@bmj.com](mailto:editorial.bmjopen@bmj.com)

# BMJ Open

## Association between vomiting in the first trimester and preterm birth: a retrospective birth cohort study in Wuhan, China

|                                 |                                                                                                                                                                                                                                                                                                                                                                                                                                                                                                                                                                                                                                                                                                                                                                                                                                                                                                                                                                                                  |
|---------------------------------|--------------------------------------------------------------------------------------------------------------------------------------------------------------------------------------------------------------------------------------------------------------------------------------------------------------------------------------------------------------------------------------------------------------------------------------------------------------------------------------------------------------------------------------------------------------------------------------------------------------------------------------------------------------------------------------------------------------------------------------------------------------------------------------------------------------------------------------------------------------------------------------------------------------------------------------------------------------------------------------------------|
| Journal:                        | <i>BMJ Open</i>                                                                                                                                                                                                                                                                                                                                                                                                                                                                                                                                                                                                                                                                                                                                                                                                                                                                                                                                                                                  |
| Manuscript ID                   | bmjopen-2017-017309.R1                                                                                                                                                                                                                                                                                                                                                                                                                                                                                                                                                                                                                                                                                                                                                                                                                                                                                                                                                                           |
| Article Type:                   | Research                                                                                                                                                                                                                                                                                                                                                                                                                                                                                                                                                                                                                                                                                                                                                                                                                                                                                                                                                                                         |
| Date Submitted by the Author:   | 07-Jun-2017                                                                                                                                                                                                                                                                                                                                                                                                                                                                                                                                                                                                                                                                                                                                                                                                                                                                                                                                                                                      |
| Complete List of Authors:       | Hu, Ronghua; Wuhan Medical and Healthcare Center for Women and Children<br>Chen, Yawen; Wuhan Medical and Healthcare Center for Women and Children,<br>Zhang, Yiming; Wuhan Medical and Healthcare Center for Women and Children<br>Qian, Zhengmin ; Saint Louis University, Department of Epidemiology, School of Public Health<br>Liu, Yan; Wuhan Medical and Healthcare Center for Women and Children<br>Vaughn, MG; Saint Louis University, School of Social Work<br>Xu, Shunqing; Tongji Medical College, Huazhong University of Science and Technology, Key Laboratory of Environment and Health, Ministry of Education & Ministry of Environmental Protection, and State Key Laboratory of Environmental Health, School of Public Health<br>Zheng, Tongzhang; Brown University, Department of Epidemiology, School of Public Health<br>Liu, Mingzhu; Wuhan Medical and Healthcare Center for Women and Children<br>Zhang, Bin; Wuhan Medical and Healthcare Center for Women and Children |
| <b>Primary Subject Heading</b>: | Epidemiology                                                                                                                                                                                                                                                                                                                                                                                                                                                                                                                                                                                                                                                                                                                                                                                                                                                                                                                                                                                     |
| Secondary Subject Heading:      | Obstetrics and gynaecology                                                                                                                                                                                                                                                                                                                                                                                                                                                                                                                                                                                                                                                                                                                                                                                                                                                                                                                                                                       |
| Keywords:                       | PRETERM BIRTH, Cohort study, pre-pregnancy body mass index, vomiting                                                                                                                                                                                                                                                                                                                                                                                                                                                                                                                                                                                                                                                                                                                                                                                                                                                                                                                             |
|                                 |                                                                                                                                                                                                                                                                                                                                                                                                                                                                                                                                                                                                                                                                                                                                                                                                                                                                                                                                                                                                  |

SCHOLARONE™  
Manuscripts

1  
2  
3  
4 **Association between vomiting in the first trimester and preterm birth:**  
5  
6 **a retrospective birth cohort study in Wuhan, China**  
7

8 Ronghua Hu<sup>1§</sup>, Yawen Chen<sup>1§</sup>, Yiming Zhang<sup>1</sup>, Zhengmin Qian<sup>2</sup>, Yan Liu<sup>1</sup>, Michael  
9 G. Vaughn<sup>2</sup>, Shunqing Xu<sup>3</sup>, Tongzhang Zheng<sup>4</sup>, Mingzhu Liu<sup>1</sup>, Bin Zhang<sup>1\*</sup>  
10  
11  
12

13 <sup>1</sup> Wuhan Medical and Healthcare Center for Women and Children, Wuhan, Hubei,  
14 People's Republic of China  
15  
16

17 <sup>2</sup> Department of Epidemiology, College for Public Health and Social Justice, Saint  
18 Louis University, MO, United States of America  
19  
20  
21

22 <sup>3</sup> Key Laboratory of Environment and Health, School of Public Health, Tongji  
23 Medical College, Huazhong University of Science and Technology, Wuhan, Hubei,  
24 People's Republic of China  
25  
26  
27  
28

29 <sup>4</sup> Department of Epidemiology, School of Public Health, Providence, Brown  
30 University, RI, United States of America  
31  
32  
33

34 <sup>§</sup>These authors contributed equally to this work  
35  
36  
37

38 **\*Corresponding author**  
39

40 Full name: Bin Zhang  
41  
42

43 Postal address: No.100 Hongkong Road, Wuhan 430014, Hubei, China,  
44  
45

46 E-mail: mchwhzb@163.com  
47  
48

49 Telephone and fax number: +86-027-82433149  
50  
51  
52  
53  
54  
55  
56  
57  
58  
59  
60

## Abstract

**Objective:** Although vomiting in the first trimester has been reported to be associated with preterm birth (PTB), findings supporting this association remain inconsistent. Our aim was to assess the association between vomiting and PTB, as well as evaluate if the association is modified by pre-pregnancy body mass index (BMI).

**Design:** A retrospective cohort study.

**Setting:** Wuhan, a central city of China.

**Participants:** A total of 317,463 pregnant women who had a live, singleton newborn from January 1, 2010, to May 23, 2016 were enrolled in our study.

**Main outcome measure:** PTB was defined as gestational age <37 gestational weeks. Gestational age was calculated using reports from mothers based on the first day of their last menstrual period. An ultrasound was routinely used to determine gestational age before 12 gestational weeks.

**Results:** Of the 317,463 pregnant women, 29.88% (94,857) experienced vomiting in the first trimester and 5.00% (15,889) experienced a PTB. Vomiting in the first trimester increased the risk for PTB and the multivariable adjusted relative risk (RR) was 1.05 (95% confidence interval (CI) = 1.02~1.09). In the stratified analyses, the association of vomiting in the first trimester was significant among underweight women (adjusted RR=1.08, 95%CI=1.04~1.17) and normal pre-pregnancy BMI women (adjusted RR=1.06, 95%CI=1.02~1.11), but not in overweight women (adjusted RR=1.01, 95% CI=0.90~1.14) and obese women (adjusted RR=0.93, 95% CI=0.73~1.19).

1  
2  
3  
4 **Conclusions:** Our study indicates that vomiting in the first trimester was associated  
5  
6 with PTB. Additionally, women with underweight and normal pre-pregnancy BMI  
7  
8 that experienced vomiting are more likely to have a PTB.  
9

10  
11 **Keywords:** vomiting; preterm birth; pre-pregnancy body mass index  
12  
13

#### 14 15 16 **Strengths and limitations of this study** 17

- 18 1. The present study is a cohort study enrolled a large population of 317,463 pregnant  
19 women.  
20  
21
- 22 2. This is the first study exploring the relationship between vomiting in the first  
23 trimester and PTB in Chinese women by pre-pregnancy BMI status.  
24  
25
- 26 3. Vomiting symptoms was based on self-reported, which may be a possible source of  
27 bias.  
28  
29
- 30 4. The prevalence of overweight and obesity were relatively low in our sample, and  
31 the relationship between vomiting and PTB in women with a high pre-pregnancy BMI  
32 needs to be further assessed.  
33  
34  
35  
36  
37  
38  
39  
40  
41  
42  
43  
44  
45  
46  
47  
48  
49  
50  
51  
52  
53  
54  
55  
56  
57  
58  
59  
60

## Introduction

Nausea and vomiting in pregnancy (NVP) is a collection of symptoms composed of nausea alone, or nausea in combination with vomiting.[1] This condition typically starts prior to 9 weeks of gestation and subsides by the end of the first trimester; however, this condition has been shown to continue into the second trimester in up to 25% of pregnant women and for 0.3-2.3% into the third trimester.[2] NVP has an important effect on both individuals and society as it causes emotional distress, depression, and can have a negative effect on a woman's activities and relationships.[3 4] NVP also has been found to lead to loss of time at work and a decrease in job productivity.[5] The etiology of NVP remains unknown, although it is currently believed to be related to early pregnancy hormones.[6]

Almost 70% of women worldwide experience NVP.[7] The average rate of vomiting only in early pregnancy is 47.1%, and the reported rates generally range from 22.3% to 63.5%.[8] A Norwegian cohort investigation reported that the rate of NVP was 33% among 51,675 women.[9] Källén et al. studied the occurrence of NVP via questionnaires in 3,675 Swedish pregnant women and observed that 38.3% of pregnant women reported vomiting in early pregnancy.[10] One previous meta-analysis, which included 23 studies comprised of 67,602 women,[11] estimated the rate of NVP in the USA to be as high as 68.6%. Meanwhile, studies on the rate of NVP in China are few and are limited by their small sample sizes. Chin et al.[12] conducted a study in a district hospital in Hong Kong in 1989 and found that the incidence of NVP was 74.9% among 1,453 patients. Another cross-sectional study

1  
2  
3  
4 conducted in a University obstetric unit in Hong Kong revealed that the prevalence of  
5  
6 NVP was 90.9% among 396 women.[13]  
7

8  
9 In previous studies, NVP was not found to be associated with primary maternal  
10  
11 diseases such as gastrointestinal infections or allergies.[8] Recently there was a  
12  
13 resurgence of interest in topics related to NVP, such as death,[14] pregnancy  
14  
15 complications,[15] and birth outcomes.[16] Some studies reported that women with  
16  
17 NVP were more likely to have a preterm birth (PTB) compared with symptom- free  
18  
19 women.[15 17 18] Still, other studies have found no association between this  
20  
21 phenomenon.[6 19] However, Czeizel and Puho have suggested that women with  
22  
23 NVP had a lower risk of PTB.[20] A Norway prospective cohort study involving  
24  
25 51,675 pregnant women found nausea to decrease the risk for PTB by 14% but did not  
26  
27 find NVP associated with PTB.[9]  
28  
29  
30  
31  
32

33  
34 To our knowledge, there has been only one case-control study, which was  
35  
36 conducted in Chinese pregnant women that addressed the relationship between PTB  
37  
38 and a severe form of NVP called *Hyperemesis Gravidarum*. [19] Information about the  
39  
40 association between vomiting in the first trimester and risk of PTB in China is unclear.  
41  
42 Furthermore, there has not been a study in which the population was grouped  
43  
44 according to pre-pregnancy BMI to determine its contribution to the identification of  
45  
46 the association between NVP and risk of PTB. Thus, our objective in the present study  
47  
48 is to explore the association between vomiting in the first trimester and PTB as well  
49  
50 as assess whether pre-pregnancy BMI modifies this association using a birth cohort  
51  
52 study in Wuhan, China.  
53  
54  
55  
56  
57  
58  
59  
60

## Materials and methods

### *Study population*

A retrospective cohort study was conducted in Wuhan China, utilizing data from the Wuhan Maternal and Child Health Management Information System (WMCHMIS). The WMCHMIS was introduced in our previous study.[21] Enrolled women included every pregnant woman who had a live, singleton newborn from January 1, 2010, to May 23, 2016. The study has been approved by the Wuhan Medical and Healthcare Center for Women and Children.

A total of 416,258 women were initially enrolled. We then excluded records with missing data on vomiting (n=95,886), offspring sex (n=22), maternal education (n=1,852), parity (n=972), and gravidity (n=48). Moreover, we also excluded those with a maternal age less than 15 (n=8) and more than 50 (n=7). The final study population consisted of 317,463 pregnancies or 76.27% of the initial population.

### *Variables*

Vomiting in the first trimester was assessed when pregnant women first visited the women and children healthcare centers. Maternal age, education, parity, gravidity, pre-pregnancy weight, and height were self-reported at their first antenatal care visit while offspring sex and other obstetric information were provided by obstetric nurses documented in WMCHMIS. Information was audited by clinicians and obstetric nurses, and a warning would be activated when illogical data were input into WMCHMIS.

Vomiting was dichotomized into yes and no response formats. Maternal age was



1  
2  
3 categorized into 3 groups: younger than 25, 25~34 years old, and 35 years old and  
4  
5 older. A proxy for socioeconomic status was the maternal education which was  
6  
7 categorized into 3 groups: less than high school, high school, and college. By parity,  
8  
9 women were dichotomized into nullipara and multipara. Regarding gravidity, it was  
10  
11 divided into less than 3 times and 3 times and more. Pre-pregnancy BMI was  
12  
13 calculated as  $\text{weight}/\text{height}^2$  and grouped into 4 categories according to Chinese  
14  
15 standard of weight for adults.[22]  
16  
17  
18  
19

20  
21 The main outcome variable was PTB. PTB was defined as gestational age <37  
22  
23 gestational weeks.[23] Gestational age was calculated using reports from mothers  
24  
25 based on the first day of their last menstrual period. An ultrasound was routinely used  
26  
27 to determine gestational age before 12 gestational weeks.  
28  
29

### 30 31 *Statistical analysis*

32  
33 Results were presented as frequencies (%). A logistic regression model was used to  
34  
35 estimate the association between vomiting in the first trimester and PTB. Results were  
36  
37 adjusted for confounders including maternal age, education, parity, gravidity, and  
38  
39 offspring sex in accord with previous studies.[9 24] We also employed a stratified  
40  
41 analysis by pre-pregnancy BMI. Crude and adjusted relative risk (RR) statistics, as  
42  
43 well as a 95% confidence interval (CI) were calculated. All statistical analyses were  
44  
45 performed using SAS version 9.2 (SAS Statistical Institute, Inc., Cary, NC).  
46  
47  
48  
49

### 50 51 **Results**

52  
53 In 317,463 pregnancies included in our study (Figure 1), gestational age ranged from  
54  
55 28 weeks to 43 weeks. Altogether, 94,857 out of 317,463 pregnant women (29.88%)  
56  
57  
58  
59  
60

reported vomiting in the first trimester. And 5.00% (15,889) of the births were delivered preterm. Maternal demographics and characteristics are shown in Table 1. Women who were older than 35 years old, had a college education, were multipara, had more than 3 times gravidity, or had a higher pre-pregnancy BMI were more likely to have a PTB. PTB was observed to be more common in female babies than in male offspring.

**Table1. Characteristics of women and infants**

|                                            | Preterm<br>(n=15,889, 5.00%) |      | Full-term<br>(n=301,574, 95.00%) |       | P      |
|--------------------------------------------|------------------------------|------|----------------------------------|-------|--------|
|                                            | n                            | %    | n                                | %     |        |
| <b>Age at delivery</b>                     |                              |      |                                  |       |        |
| <25                                        | 3091                         | 3.62 | 82224                            | 96.38 |        |
| 25~34                                      | 11055                        | 5.17 | 202692                           | 94.83 | <0.001 |
| ≥35                                        | 1743                         | 9.47 | 16658                            | 90.53 |        |
| <b>Education level</b>                     |                              |      |                                  |       |        |
| Less than high school                      | 3519                         | 4.55 | 73737                            | 95.45 |        |
| High school                                | 5010                         | 4.71 | 101458                           | 95.29 | <0.001 |
| College                                    | 7360                         | 5.50 | 126379                           | 94.50 |        |
| <b>Offspring sex</b>                       |                              |      |                                  |       |        |
| Female                                     | 9188                         | 5.41 | 160671                           | 94.59 |        |
| Male                                       | 6701                         | 4.54 | 140903                           | 95.46 | <0.001 |
| <b>Parity</b>                              |                              |      |                                  |       |        |
| Nullipara                                  | 11948                        | 4.65 | 245121                           | 95.35 |        |
| Multipara                                  | 3941                         | 9.53 | 56453                            | 93.47 | <0.001 |
| <b>Gravidity</b>                           |                              |      |                                  |       |        |
| <3                                         | 11471                        | 4.59 | 238259                           | 95.41 |        |
| ≥3                                         | 4418                         | 6.52 | 63315                            | 93.48 | <0.001 |
| <b>Pre-pregnancy BMI(kg/m<sup>2</sup>)</b> |                              |      |                                  |       |        |
| Underweight (<18.5)                        | 3118                         | 4.21 | 70916                            | 95.79 |        |
| Normal (18.5~23.9)                         | 11083                        | 5.03 | 209246                           | 94.97 |        |
| Overweight(24~27.9)                        | 1360                         | 6.94 | 18226                            | 93.06 | <0.001 |
| Obese(≥28)                                 | 328                          | 9.33 | 3186                             | 90.67 |        |
| <b>Vomiting</b>                            |                              |      |                                  |       |        |

|     |       |      |        |       |                  |
|-----|-------|------|--------|-------|------------------|
| Yse | 4978  | 5.25 | 89879  | 94.75 | <b>&lt;0.001</b> |
| No  | 10911 | 4.90 | 211695 | 95.10 |                  |

When vomiting women were compared with non-vomiting women, we found that vomiting in the first trimester produced a significant increase in risk for PTB, with RR=1.08 and 95% CI=1.04~1.13. The relationship still persisted (RR=1.05, 95% CI=1.02~1.09, Table 2) after adjustment for aforementioned confounders. In the additional stratified analyses, the results showed that vomiting in the first trimester was associated with PTB in underweight women (RR=1.08, 95%CI=1.04~1.17) and in women with a normal pre-pregnancy BMI (RR=1.06, 95%CI=1.02~1.11), but not among overweight and obese groups. After adjusting for the same set of confounders, no changes occurred in the results (Table 2).

**Table 2 Association between vomiting and PTB and its association stratified by pre-pregnancy BMI**

|                    | Pre-term<br>n (%) | Full-term<br>n (%) | Unadjusted<br>RR (95% CI) | <i>P</i>         | Adjusted<br>RR (95% CI)* | <i>P</i>                  |
|--------------------|-------------------|--------------------|---------------------------|------------------|--------------------------|---------------------------|
| <b>Vomiting</b>    |                   |                    |                           |                  |                          |                           |
| Yes                | 4978(5.25)        | 89879(94.75)       | 1.075(1.038, 1.112)       | <b>&lt;0.001</b> | 1.051(1.015, 1.088)      | <b>0.0048<sup>a</sup></b> |
| No                 | 10911(4.90)       | 211695(95.10)      | 1.00                      |                  | 1.00                     |                           |
| <b>Underweight</b> |                   |                    |                           |                  |                          |                           |
| <b>Vomiting</b>    |                   |                    |                           |                  |                          |                           |
| Yes                | 810(4.49)         | 17216(95.56)       | 1.077(1.052,1.169)        | <b>0.0042</b>    | 1.080(1.041,1.173)       | <b>0.0082<sup>b</sup></b> |
| No                 | 2308(4.12)        | 53700(95.86)       | 1.00                      |                  | 1.00                     |                           |
| <b>Normal</b>      |                   |                    |                           |                  |                          |                           |
| <b>Vomiting</b>    |                   |                    |                           |                  |                          |                           |
| Yes                | 3610(5.22)        | 65485(94.78)       | 1.061(1.041,1.105)        | <b>0.0048</b>    | 1.059(1.017,1.0103)      | <b>0.0058<sup>b</sup></b> |
| No                 | 7473(4.94)        | 143761(95.06)      | 1.00                      |                  | 1.00                     |                           |
| <b>Overweight</b>  |                   |                    |                           |                  |                          |                           |
| <b>Vomiting</b>    |                   |                    |                           |                  |                          |                           |
| Yes                | 462(7.04)         | 6099(92.96)        | 1.023(0.911,1.149)        | 0.7012           | 1.011(0.899,1.136)       | 0.8547 <sup>b</sup>       |
| No                 | 898(6.89)         | 12127(93.11)       | 1.00                      |                  | 1.00                     |                           |

**Obese****Vomiting**

|     |           |             |                    |        |                    |                     |
|-----|-----------|-------------|--------------------|--------|--------------------|---------------------|
| Yes | 106(8.95) | 1079(91.05) | 0.932(0.731,1.189) | 0.5719 | 0.928(0.727,1.185) | 0.5508 <sup>b</sup> |
| No  | 222(9.53) | 2107(90.47) | 1.00               |        | 1.00               |                     |

RR: relative risk; CI: confidence interval.

<sup>a</sup> Adjusted for maternal age, education, parity, gravidity, pre-pregnancy BMI, and offspring sex;

<sup>b</sup> Adjusted for maternal age, education, parity, gravidity, and offspring sex.

**Discussion**

Nausea and vomiting (NVP) while pregnant has far reaching effects on the mental and physical health of mothers and their offspring. Little research has accrued on the association between NVP and PTB in China, especially taking into account pre-pregnancy BMI. This study showed that nearly 30% of Chinese pregnant women had experienced vomiting in the first trimester. The rate of vomiting in Chinese women was somewhat different than in other studies.[9 11 25-27] A Norwegian cohort study reported that the rate of NVP was 33% among 51,675 women with 15 gestational weeks,[9] which was higher than our findings. A previous meta-analysis estimated the rate of NVP in the USA was 68.6% including 23 studies composed of 67,602 women.[11] Conflicting results can likely be explained by heterogeneity of populations, methods, definitions and confounders.

Our results showed that socio-demographic factors, such as age, education level, parity, and gravidity, might influence PTB. Previous studies have indicated that women with advanced maternal age were associated with increased risk of PTB.[28 29] Araya BM et al. reported that age >35 years, delivery of more than two fetuses, and <8 years of education were risks factors for PTB.[29] Women aged >35 had

1  
2  
3  
4 longer exposure times to chronic pathologies and unhealthy lifestyles,[30] and higher  
5  
6 prevalence of maternal obesity in older mothers, which were associated with risks  
7  
8 factors for PTB.[31] Several studies demonstrated that the lower the socio-economic  
9  
10 and education level, the higher the probability of developing infection, and that was  
11  
12 clearly associated with PTB before 30 weeks of gestation.[32 33]  
13  
14

15  
16 In this large cohort study conducted among Chinese women, we have found an  
17  
18 association between vomiting in the first trimester and PTB before 37 weeks of  
19  
20 gestation. When compared with non-vomiting pregnant women, women that  
21  
22 experienced vomiting were at an increased risk of PTB. Our results were inconsistent  
23  
24 with that of other studies.[15 18 34 35] For example, Andrew and Puho indicated that  
25  
26 there was a significant association of vomiting with a decreased risk of PTB,[20] and  
27  
28 Naumann et al. found that vomiting was not associated with PTB.[27] The differences  
29  
30 found among these studies may be attributed to race, definition or classification of  
31  
32 vomiting, and the differential sample sizes of the populations mentioned above.  
33  
34  
35  
36  
37  
38

39 The possible causal link between vomiting and PTB remains elusive. The most  
40  
41 common hypothesis proffered to explain the harmful effects of vomiting is based on  
42  
43 the fact that vomiting leads to abnormal digestive function, which results in a lower  
44  
45 nutrient intake of pregnant women.[14 36] Vomiting may also affect maternal and  
46  
47 fetal physiology through dehydration and the modulation of stress-related risk  
48  
49 factors.[37 38] Moreover, vomiting may cause low maternal weight gain during  
50  
51 pregnancy, which has been associated with PTB as reported by Canadian research.[6]  
52  
53  
54  
55

56 Additionally, our results reveal that vomiting was a risk factor for PTB in women  
57  
58  
59  
60

1  
2  
3  
4 with underweight and normal pre-pregnancy BMI, but not in overweight and obese  
5  
6 women. Previous studies have estimated the risk factors for vomiting and PTB  
7  
8 separately and found different effects of pre-pregnancy BMI on vomiting and  
9  
10 PTB.[39-41] No study has assessed the association between vomiting and PTB by  
11  
12 pre-pregnancy BMI. The biological mechanisms underlying the associations with  
13  
14 maternal pre-pregnancy BMIs remain unclear. Gary et al. indicated that the  
15  
16 relationship between pre-pregnancy BMI and risk of PTB were complex.[23]  
17  
18 Although it was not statistically significant, a trend towards lower risk for PTB in  
19  
20 obese women with vomiting was observed. We speculate that vomiting may have  
21  
22 relatively few impacts on the nutrition of obese women due to their increased  
23  
24 capacity for energy storage.  
25  
26  
27  
28  
29

30  
31 Strengths of this study are as follows. First, this is the first study exploring the  
32  
33 relationship between vomiting in the first trimester and PTB in Chinese women while  
34  
35 assessing the association between PTB and vomiting by pre-pregnancy BMI status.  
36  
37 Second, the data were collected from the large population-based cohort and linked to  
38  
39 the WMCHMIS, providing thorough and detailed access to pregnancy and birth  
40  
41 outcomes. Third, with such a large cohort size, many significant associations tend to  
42  
43 appear, and the merit of these in the clinical setting is notable. However, there are two  
44  
45 limitations. One is the reliance on self-reported data on vomiting. Retrospective  
46  
47 evaluation of vomiting symptoms has been reported as a possible source of bias.[42]  
48  
49 The other is that the prevalence of overweight and obesity were relatively low in our  
50  
51 sample (6.17% and 1.10%, respectively) and the relationship between vomiting and  
52  
53  
54  
55  
56  
57  
58  
59  
60

1  
2  
3  
4 PTB in women with a high pre-pregnancy BMI needs to be further assessed.  
5

### 6 7 **Conclusion**

8  
9 This study showed that vomiting presented an increased risk for PTB based on a large  
10  
11 cohort study in China, although the effect was small. Vomiting was a risk for PTB in  
12  
13 women who were underweight and normal weight based on their pre-pregnancy BMI.  
14  
15 Although no significant association between vomiting and PTB in overweight and  
16  
17 obese women was observed, clinicians should give all women suitable guidance for  
18  
19 dealing with vomiting to ensure improved pregnancy outcomes. Finally, we recognize  
20  
21 the need for greater clarity with respect to the association between vomiting and PTB  
22  
23 and encourage researchers to build on our findings.  
24  
25  
26  
27

### 28 29 **Acknowledgement**

30  
31 We are extremely grateful to all the families who took part in this study, the staff of  
32  
33 the Wuhan Health Bureau, and all the hospitals and community health centers  
34  
35 involved in this study.  
36  
37

### 38 39 **Ethics approval**

40  
41 The Institutional Review Board of Wuhan Medical and Healthcare Center for Women  
42  
43 and Children received and approved this study (approved on 10/13/2016).  
44  
45

### 46 47 **Funding**

48  
49 None.  
50

### 51 52 **Patient consent**

53  
54 Obtained.  
55

### 56 57 **Competing interests**

1  
2  
3  
4 None declared.

5  
6 **Data sharing statement**

7  
8 No additional data are available.

9  
10  
11 **Contribution to authorship**

12  
13 RHH, YWC, BZ designed the research; YWC, YMZ, MZL analyzed data; RHH,  
14  
15 YWC, YL drafted the manuscript; ZMQ, MG, SQX, TZZ, BZ revised the  
16  
17  
18  
19 manuscript.

20  
21  
22  
23 **References**

- 24  
25  
26 1. Flaxman SM, Sherman PW. Morning sickness: a mechanism for protecting mother and embryo. The  
27  
28 Quarterly review of biology 2000;**75**(2):113-48
- 29  
30  
31 2. Koren G, Madjunkova S, Maltepe C. The protective effects of nausea and vomiting of pregnancy  
32  
33 against adverse fetal outcome--a systematic review. Reproductive toxicology 2014;**47**:77-80  
34  
35 doi: 10.1016/j.reprotox.2014.05.012[published Online First: Epub Date].
- 36  
37  
38 3. Gadsby R, Barnie-Adshead AM, Jagger C. A prospective study of nausea and vomiting during  
39  
40 pregnancy. The British journal of general practice : the journal of the Royal College of  
41  
42 General Practitioners 1993;**43**(371):245-8
- 43  
44  
45 4. Mazzotta P, Maltepe C, Navioz Y, Magee LA, Koren G. Attitudes, management and consequences of  
46  
47  
48 nausea and vomiting of pregnancy in the United States and Canada. International journal of  
49  
50 gynaecology and obstetrics: the official organ of the International Federation of Gynaecology  
51  
52 and Obstetrics 2000;**70**(3):359-65
- 53  
54  
55  
56 5. Smith C, Crowther C, Beilby J, Dandeaux J. The impact of nausea and vomiting on women: a  
57  
58  
59  
60



- burden of early pregnancy. *The Australian & New Zealand journal of obstetrics & gynaecology* 2000;**40**(4):397-401
6. Dodds L, Fell DB, Joseph KS, Allen VM, Butler B. Outcomes of pregnancies complicated by hyperemesis gravidarum. *Obstetrics and gynecology* 2006;**107**(2 Pt 1):285-92 doi: 10.1097/01.AOG.0000195060.22832.cd[published Online First: Epub Date].
7. Einarson TR, Piwko C, Koren G. Quantifying the global rates of nausea and vomiting of pregnancy: a meta analysis. *Journal of population therapeutics and clinical pharmacology = Journal de la therapeutique des populations et de la pharamcologie clinique* 2013;**20**(2):e171-83
8. Koch KL, Frissora CL. Nausea and vomiting during pregnancy. *Gastroenterology clinics of North America* 2003;**32**(1):201-34, vi
9. Chortatos A, Haugen M, Iversen PO, et al. Pregnancy complications and birth outcomes among women experiencing nausea only or nausea and vomiting during pregnancy in the Norwegian Mother and Child Cohort Study. *BMC Pregnancy Childbirth* 2015;**15**:138 doi: 10.1186/s12884-015-0580-6[published Online First: Epub Date].
10. Kallen B, Lundberg G, Aberg A. Relationship between vitamin use, smoking, and nausea and vomiting of pregnancy. *Acta obstetricia et gynecologica Scandinavica* 2003;**82**(10):916-20
11. Einarson TR, Piwko C, Koren G. Prevalence of nausea and vomiting of pregnancy in the USA: a meta analysis. *Journal of population therapeutics and clinical pharmacology = Journal de la therapeutique des populations et de la pharamcologie clinique* 2013;**20**(2):e163-70
12. Chin RK. Antenatal complications and perinatal outcome in patients with nausea and vomiting-complicated pregnancy. *European journal of obstetrics, gynecology, and reproductive biology* 1989;**33**(3):215-9

- 1  
2  
3  
4  
5  
6  
7  
8  
9  
10  
11  
12  
13  
14  
15  
16  
17  
18  
19  
20  
21  
22  
23  
24  
25  
26  
27  
28  
29  
30  
31  
32  
33  
34  
35  
36  
37  
38  
39  
40  
41  
42  
43  
44  
45  
46  
47  
48  
49  
50  
51  
52  
53  
54  
55  
56  
57  
58  
59  
60
13. Chan OK, Sahota DS, Leung TY, Chan LW, Fung TY, Lau TK. Nausea and vomiting in health-related quality of life among Chinese pregnant women. *The Australian & New Zealand journal of obstetrics & gynaecology* 2010;**50**(6):512-8 doi: 10.1111/j.1479-828X.2010.01216.x[published Online First: Epub Date]].
14. Birkeland E, Stokke G, Tangvik RJ, et al. Norwegian PUQE (Pregnancy-Unique Quantification of Emesis and nausea) identifies patients with hyperemesis gravidarum and poor nutritional intake: a prospective cohort validation study. *PLoS one* 2015;**10**(4):e0119962 doi: 10.1371/journal.pone.0119962[published Online First: Epub Date]].
15. Roseboom TJ, Ravelli AC, van der Post JA, Painter RC. Maternal characteristics largely explain poor pregnancy outcome after hyperemesis gravidarum. *European journal of obstetrics, gynecology, and reproductive biology* 2011;**156**(1):56-9 doi: 10.1016/j.ejogrb.2011.01.010[published Online First: Epub Date]].
16. Chan RL, Olshan AF, Savitz DA, et al. Severity and duration of nausea and vomiting symptoms in pregnancy and spontaneous abortion. *Human reproduction* 2010;**25**(11):2907-12 doi: 10.1093/humrep/deq260[published Online First: Epub Date]].
17. Paauw JD, Bierling S, Cook CR, Davis AT. Hyperemesis gravidarum and fetal outcome. *JPEN. Journal of parenteral and enteral nutrition* 2005;**29**(2):93-6
18. Temming L, Franco A, Istwan N, et al. Adverse pregnancy outcomes in women with nausea and vomiting of pregnancy. *The journal of maternal-fetal & neonatal medicine : the official journal of the European Association of Perinatal Medicine, the Federation of Asia and Oceania Perinatal Societies, the International Society of Perinatal Obstet* 2014;**27**(1):84-8 doi: 10.3109/14767058.2013.806473[published Online First: Epub Date]].

- 1  
2  
3  
4 19. Zhang J, Cai WW. Severe vomiting during pregnancy: antenatal correlates and fetal outcomes.  
5  
6 Epidemiology 1991;**2**(6):454-7  
7  
8  
9 20. Czeizel AE, Puho E. Association between severe nausea and vomiting in pregnancy and lower rate  
10  
11 of preterm births. Paediatric and perinatal epidemiology 2004;**18**(4):253-9 doi:  
12  
13 10.1111/j.1365-3016.2004.00568.x[published Online First: Epub Date]].  
14  
15  
16 21. Zhou A, Xiong C, Hu R, et al. Pre-Pregnancy BMI, Gestational Weight Gain, and the Risk of  
17  
18 Hypertensive Disorders of Pregnancy: A Cohort Study in Wuhan, China. PloS one  
19  
20  
21 2015;**10**(8):e0136291 doi: 10.1371/journal.pone.0136291[published Online First: Epub Date]].  
22  
23  
24 22. Wang Y, Mi J, Shan XY, Wang QJ, Ge KY. Is China facing an obesity epidemic and the  
25  
26 consequences? The trends in obesity and chronic disease in China. International journal of  
27  
28 obesity (2005) 2007;**31**(1):177-88 doi: 10.1038/sj.ijo.0803354[published Online First: Epub  
29  
30 Date]].  
31  
32  
33 23. Shaw GM, Wise PH, Mayo J, et al. Maternal prepregnancy body mass index and risk of  
34  
35 spontaneous preterm birth. Paediatric and perinatal epidemiology 2014;**28**(4):302-11 doi:  
36  
37 10.1111/ppe.12125[published Online First: Epub Date]].  
38  
39  
40 24. Vikanes AV, Stoer NC, Magnus P, Grjibovski AM. Hyperemesis gravidarum and pregnancy  
41  
42 outcomes in the Norwegian Mother and Child Cohort - a cohort study. BMC pregnancy and  
43  
44 childbirth 2013;**13**:169 doi: 10.1186/1471-2393-13-169[published Online First: Epub Date]].  
45  
46  
47 25. Klebanoff MA, Koslowe PA, Kaslow R, Rhoads GG. Epidemiology of vomiting in early pregnancy.  
48  
49  
50  
51  
52  
53  
54  
55 26. Tierson FD, Olsen CL, Hook EB. Nausea and vomiting of pregnancy and association with  
56  
57 pregnancy outcome. American journal of obstetrics and gynecology 1986;**155**(5):1017-22  
58  
59  
60

- 1  
2  
3  
4 27. Naumann CR, Zelig C, Napolitano PG, Ko CW. Nausea, vomiting, and heartburn in pregnancy: a  
5  
6 prospective look at risk, treatment, and outcome. *The journal of maternal-fetal & neonatal*  
7  
8 *medicine : the official journal of the European Association of Perinatal Medicine, the*  
9  
10 *Federation of Asia and Oceania Perinatal Societies, the International Society of Perinatal*  
11  
12 *Obstet* 2012;**25**(8):1488-93 doi: 10.3109/14767058.2011.644363[published Online First: Epub  
13  
14 Date]].
- 15  
16  
17  
18 28. Laopaiboon M, Lumbiganon P, Intarut N, et al. Advanced maternal age and pregnancy outcomes: a  
19  
20 multicountry assessment. *BJOG : an international journal of obstetrics and gynaecology*  
21  
22 2014;**121 Suppl 1**:49-56 doi: 10.1111/1471-0528.12659[published Online First: Epub Date]].
- 23  
24  
25  
26 29. Araya BM, Diaz M, Paredes D, Ortiz J. Association between preterm birth and its subtypes and  
27  
28 maternal sociodemographic characteristics during the post-transitional phase in a developing  
29  
30 country with a very high human development index. *Public health* 2017;**147**:39-46 doi:  
31  
32 10.1016/j.puhe.2017.01.027[published Online First: Epub Date]].
- 33  
34  
35  
36 30. Chen X, Scholl TO. Association of elevated free fatty acids during late pregnancy with preterm  
37  
38 delivery. *Obstetrics and gynecology* 2008;**112**(2 Pt 1):297-303 doi:  
39  
40 10.1097/AOG.0b013e3181802150[published Online First: Epub Date]].
- 41  
42  
43  
44 31. Passini R, Jr., Cecatti JG, Lajos GJ, et al. Brazilian multicentre study on preterm birth (EMIP):  
45  
46 prevalence and factors associated with spontaneous preterm birth. *PloS one*  
47  
48 2014;**9**(10):e109069 doi: 10.1371/journal.pone.0109069[published Online First: Epub Date]].
- 49  
50  
51  
52 32. Ovalle A, Kakarieka E, Rencoret G, et al. [Risk factors for preterm deliveries in a public hospital].  
53  
54 *Revista medica de Chile* 2012;**140**(1):19-29 doi: /S0034-98872012000100003[published  
55  
56 Online First: Epub Date]].
- 57  
58  
59  
60

- 1  
2  
3  
4 33. Goldenberg RL, Culhane JF, Iams JD, Romero R. Epidemiology and causes of preterm birth.  
5  
6 Lancet 2008;**371**(9606):75-84 doi: 10.1016/S0140-6736(08)60074-4[published Online First:  
7  
8 Epub Date]].  
9
- 10  
11 34. Veenendaal MV, van Abeelen AF, Painter RC, van der Post JA, Roseboom TJ. Consequences of  
12  
13 hyperemesis gravidarum for offspring: a systematic review and meta-analysis. BJOG : an  
14  
15 international journal of obstetrics and gynaecology 2011;**118**(11):1302-13 doi:  
16  
17 10.1111/j.1471-0528.2011.03023.x[published Online First: Epub Date]].  
18  
19
- 20  
21 35. Schiff MA, Reed SD, Daling JR. The sex ratio of pregnancies complicated by hospitalisation for  
22  
23 hyperemesis gravidarum. BJOG : an international journal of obstetrics and gynaecology  
24  
25 2004;**111**(1):27-30  
26  
27
- 28  
29 36. Lee J-I, Lee J-A, Lim H-S. Morning sickness reduces dietary diversity, nutrient intakes, and infant  
30  
31 outcome of pregnant women. Nutrition Research 2004;**24**(7):531-40 doi:  
32  
33 10.1016/j.nutres.2003.10.011[published Online First: Epub Date]].  
34  
35
- 36  
37 37. Jarnfelt-Samsioe A, Eriksson B, Waldenstrom J, Samsioe G. Some new aspects on emesis  
38  
39 gravidarum. Relations to clinical data, serum electrolytes, total protein and creatinine.  
40  
41 Gynecologic and obstetric investigation 1985;**19**(4):174-86  
42  
43
- 44  
45 38. Haugen M, Vikanes A, Brantsaeter AL, Meltzer HM, Grjibovski AM, Magnus P. Diet before  
46  
47 pregnancy and the risk of hyperemesis gravidarum. The British journal of nutrition  
48  
49 2011;**106**(4):596-602 doi: 10.1017/s0007114511000675[published Online First: Epub Date]].  
50  
51
- 52  
53 39. Huxley RR. Nausea and vomiting in early pregnancy: its role in placental development. Obstetrics  
54  
55 and gynecology 2000;**95**(5):779-82  
56  
57
- 58  
59 40. Girsen AI, Mayo JA, Carmichael SL, et al. Women's prepregnancy underweight as a risk factor for  
60

1  
2  
3  
4 preterm birth: a retrospective study. BJOG : an international journal of obstetrics and  
5  
6 gynaecology 2016;**123**(12):2001-07 doi: 10.1111/1471-0528.14027[published Online First:  
7  
8 Epub Date]].  
9

10  
11 41. Pan Y, Zhang S, Wang Q, et al. Investigating the association between prepregnancy body mass  
12  
13 index and adverse pregnancy outcomes: a large cohort study of 536 098 Chinese pregnant  
14  
15 women in rural China. BMJ open 2016;**6**(6):e011227 doi:  
16  
17 10.1136/bmjopen-2016-011227[published Online First: Epub Date]].  
18  
19

20  
21 42. Koren G, Maltepe C, Navioz Y, Wolpin J. Recall bias of the symptoms of nausea and vomiting of  
22  
23 pregnancy. American journal of obstetrics and gynecology 2004;**190**(2):485-8 doi:  
24  
25 10.1016/j.ajog.2003.08.039[published Online First: Epub Date].  
26  
27  
28  
29  
30  
31  
32  
33  
34  
35  
36  
37  
38  
39  
40  
41  
42  
43  
44  
45  
46  
47  
48  
49  
50  
51  
52  
53  
54  
55  
56  
57  
58  
59  
60

1  
2  
3  
4  
5  
6  
7  
8  
9  
10  
11  
12  
13  
14  
15  
16  
17  
18  
19  
20  
21  
22  
23  
24  
25  
26  
27  
28  
29  
30  
31  
32  
33  
34  
35  
36  
37  
38  
39  
40  
41  
42  
43  
44  
45  
46  
47  
48  
49  
50  
51  
52  
53  
54  
55  
56  
57  
58  
59  
60

**Figure legends**

Figure 1. Flow chart of population selection

For peer review only

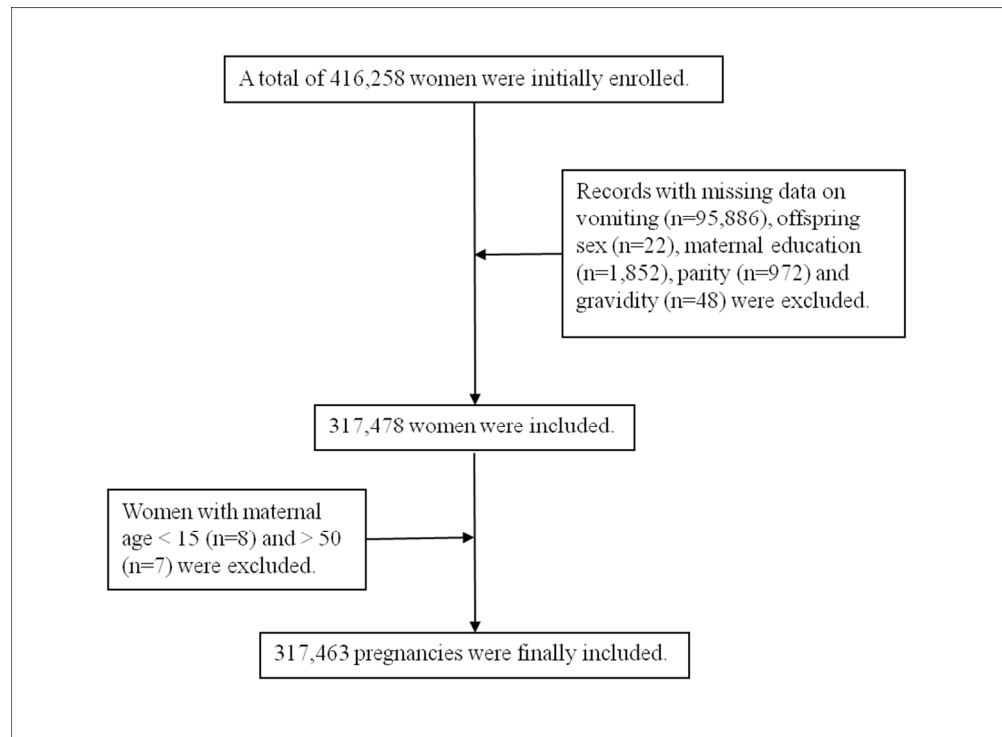

Figure 1 Flow chart of population selection

186x136mm (150 x 150 DPI)



STROBE Statement—Checklist of items that should be included in reports of *cohort studies*

|                              | Item No | Recommendation                                                                                                                                                                                    | No. of Page |
|------------------------------|---------|---------------------------------------------------------------------------------------------------------------------------------------------------------------------------------------------------|-------------|
| <b>Title and abstract</b>    | 1       | (a) Indicate the study's design with a commonly used term in the title or the abstract                                                                                                            | 1           |
|                              |         | (b) Provide in the abstract an informative and balanced summary of what was done and what was found                                                                                               | 2-3         |
| <b>Introduction</b>          |         |                                                                                                                                                                                                   |             |
| Background/rationale         | 2       | Explain the scientific background and rationale for the investigation being reported                                                                                                              | 4-5         |
| Objectives                   | 3       | State specific objectives, including any prespecified hypotheses                                                                                                                                  | 5           |
| <b>Methods</b>               |         |                                                                                                                                                                                                   |             |
| Study design                 | 4       | Present key elements of study design early in the paper                                                                                                                                           | 6           |
| Setting                      | 5       | Describe the setting, locations, and relevant dates, including periods of recruitment, exposure, follow-up, and data collection                                                                   | 6           |
| Participants                 | 6       | (a) Give the eligibility criteria, and the sources and methods of selection of participants. Describe methods of follow-up                                                                        | 6           |
|                              |         | (b) For matched studies, give matching criteria and number of exposed and unexposed                                                                                                               | 6           |
| Variables                    | 7       | Clearly define all outcomes, exposures, predictors, potential confounders, and effect modifiers. Give diagnostic criteria, if applicable                                                          | 6           |
| Data sources/<br>measurement | 8*      | For each variable of interest, give sources of data and details of methods of assessment (measurement). Describe comparability of assessment methods if there is more than one group              | 6-7         |
| Bias                         | 9       | Describe any efforts to address potential sources of bias                                                                                                                                         | 6           |
| Study size                   | 10      | Explain how the study size was arrived at                                                                                                                                                         | 6           |
| Quantitative variables       | 11      | Explain how quantitative variables were handled in the analyses. If applicable, describe which groupings were chosen and why                                                                      | 7           |
| Statistical methods          | 12      | (a) Describe all statistical methods, including those used to control for confounding                                                                                                             | 7           |
|                              |         | (b) Describe any methods used to examine subgroups and interactions                                                                                                                               | 7           |
|                              |         | (c) Explain how missing data were addressed                                                                                                                                                       | 6           |
|                              |         | (d) If applicable, explain how loss to follow-up was addressed                                                                                                                                    | NR          |
|                              |         | (e) Describe any sensitivity analyses                                                                                                                                                             | NR          |
| <b>Results</b>               |         |                                                                                                                                                                                                   |             |
| Participants                 | 13*     | (a) Report numbers of individuals at each stage of study—eg numbers potentially eligible, examined for eligibility, confirmed eligible, included in the study, completing follow-up, and analysed | 7-8         |
|                              |         | (b) Give reasons for non-participation at each stage                                                                                                                                              | 8           |
|                              |         | (c) Consider use of a flow diagram                                                                                                                                                                | 7           |
| Descriptive data             | 14*     | (a) Give characteristics of study participants (eg demographic, clinical, social) and information on exposures and potential confounders                                                          | 7-8         |
|                              |         | (b) Indicate number of participants with missing data for each variable of interest                                                                                                               | 8           |
|                              |         | (c) Summarise follow-up time (eg, average and total amount)                                                                                                                                       | 8           |
| Outcome data                 | 15*     | Report numbers of outcome events or summary measures over time                                                                                                                                    | 7-8         |
| Main results                 | 16      | (a) Give unadjusted estimates and, if applicable, confounder-adjusted estimates and their precision (eg, 95% confidence interval). Make clear                                                     | 8-9         |

|                          |    |                                                                                                                                                                            |       |
|--------------------------|----|----------------------------------------------------------------------------------------------------------------------------------------------------------------------------|-------|
|                          |    | which confounders were adjusted for and why they were included                                                                                                             |       |
|                          |    | (b) Report category boundaries when continuous variables were categorized                                                                                                  | 8     |
|                          |    | (c) If relevant, consider translating estimates of relative risk into absolute risk for a meaningful time period                                                           | 9     |
| Other analyses           | 17 | Report other analyses done—eg analyses of subgroups and interactions, and sensitivity analyses                                                                             | 9     |
| <b>Discussion</b>        |    |                                                                                                                                                                            |       |
| Key results              | 18 | Summarise key results with reference to study objectives                                                                                                                   | 10-11 |
| Limitations              | 19 | Discuss limitations of the study, taking into account sources of potential bias or imprecision. Discuss both direction and magnitude of any potential bias                 |       |
| Interpretation           | 20 | Give a cautious overall interpretation of results considering objectives, limitations, multiplicity of analyses, results from similar studies, and other relevant evidence | 12    |
| Generalisability         | 21 | Discuss the generalisability (external validity) of the study results                                                                                                      | 12    |
| <b>Other information</b> |    |                                                                                                                                                                            |       |
| Funding                  | 22 | Give the source of funding and the role of the funders for the present study and, if applicable, for the original study on which the present article is based              | 13    |

\*Give information separately for exposed and unexposed groups.

**Note:** An Explanation and Elaboration article discusses each checklist item and gives methodological background and published examples of transparent reporting. The STROBE checklist is best used in conjunction with this article (freely available on the Web sites of PLoS Medicine at <http://www.plosmedicine.org/>, Annals of Internal Medicine at <http://www.annals.org/>, and Epidemiology at <http://www.epidem.com/>). Information on the STROBE Initiative is available at <http://www.strobe-statement.org>.

# BMJ Open

## Association between vomiting in the first trimester and preterm birth: a retrospective birth cohort study in Wuhan, China

|                                 |                                                                                                                                                                                                                                                                                                                                                                                                                                                                                                                                                                                                                                                                                                                                                                                                                                                                                                                                                                                                                                                                                                                                                                                                                                                                                                                                                                                                                                                                                                                                                                              |
|---------------------------------|------------------------------------------------------------------------------------------------------------------------------------------------------------------------------------------------------------------------------------------------------------------------------------------------------------------------------------------------------------------------------------------------------------------------------------------------------------------------------------------------------------------------------------------------------------------------------------------------------------------------------------------------------------------------------------------------------------------------------------------------------------------------------------------------------------------------------------------------------------------------------------------------------------------------------------------------------------------------------------------------------------------------------------------------------------------------------------------------------------------------------------------------------------------------------------------------------------------------------------------------------------------------------------------------------------------------------------------------------------------------------------------------------------------------------------------------------------------------------------------------------------------------------------------------------------------------------|
| Journal:                        | <i>BMJ Open</i>                                                                                                                                                                                                                                                                                                                                                                                                                                                                                                                                                                                                                                                                                                                                                                                                                                                                                                                                                                                                                                                                                                                                                                                                                                                                                                                                                                                                                                                                                                                                                              |
| Manuscript ID                   | bmjopen-2017-017309.R2                                                                                                                                                                                                                                                                                                                                                                                                                                                                                                                                                                                                                                                                                                                                                                                                                                                                                                                                                                                                                                                                                                                                                                                                                                                                                                                                                                                                                                                                                                                                                       |
| Article Type:                   | Research                                                                                                                                                                                                                                                                                                                                                                                                                                                                                                                                                                                                                                                                                                                                                                                                                                                                                                                                                                                                                                                                                                                                                                                                                                                                                                                                                                                                                                                                                                                                                                     |
| Date Submitted by the Author:   | 02-Aug-2017                                                                                                                                                                                                                                                                                                                                                                                                                                                                                                                                                                                                                                                                                                                                                                                                                                                                                                                                                                                                                                                                                                                                                                                                                                                                                                                                                                                                                                                                                                                                                                  |
| Complete List of Authors:       | <p>Hu, Ronghua; Wuhan Children's Hospital (Wuhan Maternal and Child Healthcare Hospital), Tongji Medical College, Huazhong University of Science and Technology</p> <p>Chen, Yawen; Wuhan Children's Hospital (Wuhan Maternal and Child Healthcare Hospital), Tongji Medical College, Huazhong University of Science and Technology</p> <p>Zhang, Yiming; Wuhan Children's Hospital (Wuhan Maternal and Child Healthcare Hospital), Tongji Medical College, Huazhong University of Science and Technology</p> <p>Qian, Zhengmin ; Saint Louis University, Department of Epidemiology, School of Public Health</p> <p>Liu, Yan; Wuhan Children's Hospital (Wuhan Maternal and Child Healthcare Hospital), Tongji Medical College, Huazhong University of Science and Technology</p> <p>Vaughn, MG; Saint Louis University, School of Social Work</p> <p>Xu, Shunqing; Tongji Medical College, Huazhong University of Science and Technology, Key Laboratory of Environment and Health, Ministry of Education &amp; Ministry of Environmental Protection, and State Key Laboratory of Environmental Health, School of Public Health</p> <p>Zheng, Tongzhang; Brown University, Department of Epidemiology, School of Public Health</p> <p>Liu, Mingzhu; Wuhan Children's Hospital (Wuhan Maternal and Child Healthcare Hospital), Tongji Medical College, Huazhong University of Science and Technology</p> <p>Zhang, Bin; Wuhan Children's Hospital (Wuhan Maternal and Child Healthcare Hospital), Tongji Medical College, Huazhong University of Science and Technology</p> |
| <b>Primary Subject Heading</b>: | Epidemiology                                                                                                                                                                                                                                                                                                                                                                                                                                                                                                                                                                                                                                                                                                                                                                                                                                                                                                                                                                                                                                                                                                                                                                                                                                                                                                                                                                                                                                                                                                                                                                 |
| Secondary Subject Heading:      | Obstetrics and gynaecology                                                                                                                                                                                                                                                                                                                                                                                                                                                                                                                                                                                                                                                                                                                                                                                                                                                                                                                                                                                                                                                                                                                                                                                                                                                                                                                                                                                                                                                                                                                                                   |
| Keywords:                       | PRETERM BIRTH, Cohort study, pre-pregnancy body mass index, vomiting                                                                                                                                                                                                                                                                                                                                                                                                                                                                                                                                                                                                                                                                                                                                                                                                                                                                                                                                                                                                                                                                                                                                                                                                                                                                                                                                                                                                                                                                                                         |

1  
2  
3  
4  
5  
6  
7  
8  
9  
10  
11  
12  
13  
14  
15  
16  
17  
18  
19  
20  
21  
22  
23  
24  
25  
26  
27  
28  
29  
30  
31  
32  
33  
34  
35  
36  
37  
38  
39  
40  
41  
42  
43  
44  
45  
46  
47  
48  
49  
50  
51  
52  
53  
54  
55  
56  
57  
58  
59  
60

For peer review only

1  
2  
3  
4  
5  
6  
7  
8  
9  
10  
11  
12  
13  
14  
15  
16  
17  
18  
19  
20  
21  
22  
23  
24  
25  
26  
27  
28  
29  
30  
31  
32  
33  
34  
35  
36  
37  
38  
39  
40  
41  
42  
43  
44  
45  
46  
47  
48  
49  
50  
51  
52  
53  
54  
55  
56  
57  
58  
59  
60

**Association between vomiting in the first trimester and preterm birth:  
a retrospective birth cohort study in Wuhan, China**

Ronghua Hu<sup>1§</sup>, Yawen Chen<sup>1§</sup>, Yiming Zhang<sup>1</sup>, Zhengmin Qian<sup>2</sup>, Yan Liu<sup>1</sup>, Michael  
G. Vaughn<sup>2</sup>, Shunqing Xu<sup>3</sup>, Tongzhang Zheng<sup>4</sup>, Mingzhu Liu<sup>1</sup>, Bin Zhang<sup>1\*</sup>

<sup>1</sup> Wuhan Children's Hospital (Wuhan Maternal and Child Healthcare Hospital), Tongji  
Medical College, Huazhong University of Science and Technology, Wuhan, Hubei,  
People's Republic of China

<sup>2</sup> Department of Epidemiology, College for Public Health and Social Justice, Saint  
Louis University, MO, United States of America

<sup>3</sup> Key Laboratory of Environment and Health, School of Public Health, Tongji  
Medical College, Huazhong University of Science and Technology, Wuhan, Hubei,  
People's Republic of China

<sup>4</sup> Department of Epidemiology, School of Public Health, Providence, Brown  
University, RI, United States of America

<sup>§</sup>These authors contributed equally to this work

**\*Corresponding author**

Full name: Bin Zhang

Postal address: No.100 Hongkong Road, Wuhan 430014, Hubei, China,

E-mail: mchwhzb@163.com

Telephone and fax number: +86-027-82433149

**Abstract**

**Objective:** Although vomiting in the first trimester has been reported to be associated with preterm birth (PTB), findings supporting this association remain inconsistent. Our aim was to assess the association between vomiting and PTB, as well as evaluate if the association is modified by pre-pregnancy body mass index (BMI).

**Design:** A retrospective cohort study.

**Setting:** Wuhan, a central city of China.

**Participants:** A total of 317,463 pregnant women who had a live, singleton newborn from January 1, 2010, to May 23, 2016 were enrolled in our study.

**Main outcome measure:** PTB was defined as gestational age <37 gestational weeks. Gestational age was calculated using reports from mothers based on the first day of their last menstrual period. An ultrasound was routinely used to determine gestational age before 12 gestational weeks.

**Results:** Of the 317,463 pregnant women, 29.88% (94,857) experienced vomiting in the first trimester and 5.00% (15,889) experienced a PTB. Vomiting in the first trimester increased the risk for PTB and the multivariable adjusted odds ratio (OR) was 1.05 (95% confidence interval (CI) = 1.02~1.09). In the stratified analyses, the association of vomiting in the first trimester was significant among underweight women (adjusted OR=1.08, 95%CI=1.04~1.17) and normal pre-pregnancy BMI women (adjusted OR=1.06, 95%CI=1.02~1.11), but not in overweight women (adjusted OR=1.01, 95% CI=0.90~1.14) and obese women (adjusted OR=0.93, 95% CI=0.73~1.19).

1  
2  
3  
4 **Conclusions:** Our study indicates that vomiting in the first trimester was associated  
5  
6 with PTB. Additionally, women with underweight and normal pre-pregnancy BMI  
7  
8 that experienced vomiting are more likely to have a PTB.  
9

10  
11 **Keywords:** vomiting; preterm birth; pre-pregnancy body mass index  
12  
13

#### 14 15 16 **Strengths and limitations of this study** 17

- 18 1. The present study is a cohort study enrolled a large population of 317,463 pregnant  
19 women.  
20  
21
- 22 2. This is the first study exploring the relationship between vomiting in the first  
23 trimester and PTB in Chinese women by pre-pregnancy BMI status.  
24  
25
- 26 3. Vomiting symptoms was based on self-reported, which may be a possible source of  
27 bias.  
28  
29
- 30 4. The prevalence of overweight and obesity were relatively low in our sample, and  
31 the relationship between vomiting and PTB in women with a high pre-pregnancy BMI  
32 needs to be further assessed.  
33  
34  
35  
36  
37  
38  
39  
40  
41  
42  
43  
44  
45  
46  
47  
48  
49  
50  
51  
52  
53  
54  
55  
56  
57  
58  
59  
60

## Introduction

Nausea and vomiting in pregnancy (NVP) is a collection of symptoms composed of nausea alone, or nausea in combination with vomiting.[1] This condition typically starts prior to 9 weeks of gestation and subsides by the end of the first trimester; however, this condition has been shown to continue into the second trimester in up to 25% of pregnant women and for 0.3-2.3% into the third trimester.[2] NVP has an important effect on both individuals and society as it causes emotional distress, depression, and can have a negative effect on a woman's activities and relationships.[3 4] NVP also has been found to lead to loss of time at work and a decrease in job productivity.[5] The etiology of NVP remains unknown, although it is currently believed to be related to early pregnancy hormones.[6]

Almost 70% of women worldwide experience NVP.[7] The average rate of vomiting only in early pregnancy is 47.1%, and the reported rates generally range from 22.3% to 63.5%.[8] A Norwegian cohort investigation reported that the rate of NVP was 33% among 51,675 women.[9] Källén et al. studied the occurrence of NVP via questionnaires in 3,675 Swedish pregnant women and observed that 38.3% of pregnant women reported vomiting in early pregnancy.[10] One previous meta-analysis, which included 23 studies comprised of 67,602 women,[11] estimated the rate of NVP in the USA to be as high as 68.6%. Meanwhile, studies on the rate of NVP in China are few and are limited by their small sample sizes. Chin et al.[12] conducted a study in a district hospital in Hong Kong in 1989 and found that the incidence of NVP was 74.9% among 1,453 patients. Another cross-sectional study



1  
2  
3  
4 conducted in a University obstetric unit in Hong Kong revealed that the prevalence of  
5  
6 NVP was 90.9% among 396 women.[13]  
7

8  
9 In previous studies, NVP was not found to be associated with primary maternal  
10  
11 diseases such as gastrointestinal infections or allergies.[8] Recently there was a  
12  
13 resurgence of interest in topics related to NVP, such as death,[14] pregnancy  
14  
15 complications,[15] and birth outcomes.[16] Some studies reported that women with  
16  
17 NVP were more likely to have a preterm birth (PTB) compared with symptom- free  
18  
19 women.[15 17 18] Still, other studies have found no association between this  
20  
21 phenomenon.[6 19] However, Czeizel and Puho have suggested that women with  
22  
23 NVP had a lower risk of PTB.[20] A Norway prospective cohort study involving  
24  
25 51,675 pregnant women found nausea to decrease the risk for PTB by 14% but did not  
26  
27 find NVP associated with PTB.[9]  
28  
29  
30  
31  
32

33  
34 To our knowledge, there has been only one case-control study, which was  
35  
36 conducted in Chinese pregnant women that addressed the relationship between PTB  
37  
38 and a severe form of NVP called *Hyperemesis Gravidarum*. [19] Information about the  
39  
40 association between vomiting in the first trimester and risk of PTB in China is unclear.  
41  
42 Furthermore, there has not been a study in which the population was grouped  
43  
44 according to pre-pregnancy BMI to determine its contribution to the identification of  
45  
46 the association between NVP and risk of PTB. Thus, our objective in the present study  
47  
48 is to explore the association between vomiting in the first trimester and PTB as well  
49  
50 as assess whether pre-pregnancy BMI modifies this association using a birth cohort  
51  
52 study in Wuhan, China.  
53  
54  
55  
56  
57  
58  
59  
60

## Materials and methods

### *Study population*

A retrospective cohort study was conducted in Wuhan China, utilizing data from the Wuhan Maternal and Child Health Management Information System (WMCHMIS). The WMCHMIS was introduced in our previous study.[21] Enrolled women included every pregnant woman who had a live, singleton newborn from January 1, 2010, to May 23, 2016. The study has been approved by the Wuhan Medical and Healthcare Center for Women and Children.

A total of 416,258 women were initially enrolled. We then excluded records with missing data on vomiting (n=95,886), offspring sex (n=22), maternal education (n=1,852), parity (n=972), and gravidity (n=48). Moreover, we also excluded those with a maternal age less than 15 (n=8) and more than 50 (n=7). The final study population consisted of 317,463 pregnancies or 76.27% of the initial population.

### *Variables*

Vomiting in the first trimester was assessed when pregnant women first visited the women and children healthcare centers. Maternal age, education, parity, gravidity, pre-pregnancy weight, and height were self-reported at their first antenatal care visit while offspring sex and other obstetric information were provided by midwives documented in WMCHMIS. Information was audited by clinicians and obstetric nurses, and a warning would be activated when illogical data were input into WMCHMIS.

Vomiting was dichotomized into yes and no response formats. Maternal age was

1  
2  
3  
4 categorized into 3 groups: younger than 25, 25~34 years old, and 35 years old and  
5  
6 older. A proxy for socioeconomic status was the maternal education which was  
7  
8 categorized into 3 groups: less than high school, high school, and college. By parity,  
9  
10 women were dichotomized into nullipara and multipara. Regarding gravidity, it was  
11  
12 divided into less than 3 times and 3 times and more. Pre-pregnancy BMI was  
13  
14 calculated as  $\text{weight}/\text{height}^2$  and grouped into 4 categories according to Chinese  
15  
16 standard of weight for adults.[22]  
17  
18  
19

20  
21 The main outcome variable was PTB. PTB was defined as gestational age <37  
22  
23 gestational weeks.[23] Gestational age was calculated using reports from mothers  
24  
25 based on the first day of their last menstrual period. An ultrasound was routinely used  
26  
27 to determine gestational age before 12 gestational weeks.  
28  
29

### 30 31 *Statistical analysis*

32  
33 Results were presented as frequencies (%). Difference between PTB group and  
34  
35 full-term group were assessed by Chi-square tests. A logistic regression model was  
36  
37 used to estimate the association between vomiting in the first trimester and PTB.  
38  
39 Results were adjusted for confounders including maternal age, education, parity,  
40  
41 gravidity, pre-pregnancy BMI, and offspring sex in accord with previous studies.[9 24]  
42  
43 We also employed a stratified analysis by pre-pregnancy BMI and the confounders  
44  
45 adjusted in stratified analysis were maternal age, education, parity, gravidity, and  
46  
47 offspring sex. Crude and adjusted odds ratios (ORs) statistics, as well as a 95%  
48  
49 confidence interval (CI) were calculated. All statistical analyses were performed using  
50  
51 SAS version 9.2 (SAS Statistical Institute, Inc., Cary, NC).  
52  
53  
54  
55  
56  
57  
58  
59  
60

## Results

In 317,463 pregnancies included in our study (Figure 1), gestational age ranged from 28 weeks to 43 weeks. Altogether, 94,857 out of 317,463 pregnant women (29.88%) reported vomiting in the first trimester. And 5.00% (15,889) of the births were delivered preterm. Maternal demographics and characteristics are shown in Table 1. Women who were older than 35 years old, had a college education, were multipara, had more than 3 times gravidity, or had a higher pre-pregnancy BMI were more likely to have a PTB. PTB was observed to be more common in female babies than in male offspring.

**Table 1. Characteristics of women and infants**

|                                            | Preterm<br>(n=15,889, 5.00%) |      | Full-term<br>(n=301,574, 95.00%) |       | P      |
|--------------------------------------------|------------------------------|------|----------------------------------|-------|--------|
|                                            | n                            | %    | n                                | %     |        |
| <b>Age at delivery</b>                     |                              |      |                                  |       |        |
| <25                                        | 3091                         | 3.62 | 82224                            | 96.38 |        |
| 25~34                                      | 11055                        | 5.17 | 202692                           | 94.83 | <0.001 |
| ≥35                                        | 1743                         | 9.47 | 16658                            | 90.53 |        |
| <b>Education level</b>                     |                              |      |                                  |       |        |
| Less than high school                      | 3519                         | 4.55 | 73737                            | 95.45 |        |
| High school                                | 5010                         | 4.71 | 101458                           | 95.29 | <0.001 |
| College                                    | 7360                         | 5.50 | 126379                           | 94.50 |        |
| <b>Offspring sex</b>                       |                              |      |                                  |       |        |
| Male                                       | 9188                         | 5.41 | 160671                           | 94.59 |        |
| Female                                     | 6701                         | 4.54 | 140903                           | 95.46 | <0.001 |
| <b>Parity</b>                              |                              |      |                                  |       |        |
| Nullipara                                  | 11948                        | 4.65 | 245121                           | 95.35 |        |
| Multipara                                  | 3941                         | 6.53 | 56453                            | 93.47 | <0.001 |
| <b>Gravidity</b>                           |                              |      |                                  |       |        |
| <3                                         | 11471                        | 4.59 | 238259                           | 95.41 |        |
| ≥3                                         | 4418                         | 6.52 | 63315                            | 93.48 | <0.001 |
| <b>Pre-pregnancy BMI(kg/m<sup>2</sup>)</b> |                              |      |                                  |       |        |

|                     |       |      |        |       |                  |
|---------------------|-------|------|--------|-------|------------------|
| Underweight (<18.5) | 3118  | 4.21 | 70916  | 95.79 |                  |
| Normal (18.5~23.9)  | 11083 | 5.03 | 209246 | 94.97 | <b>&lt;0.001</b> |
| Overweight(24~27.9) | 1360  | 6.94 | 18226  | 93.06 |                  |
| Obese( $\geq$ 28)   | 328   | 9.33 | 3186   | 90.67 |                  |
| <b>Vomiting</b>     |       |      |        |       |                  |
| Yse                 | 4978  | 5.25 | 89879  | 94.75 | <b>&lt;0.001</b> |
| No                  | 10911 | 4.90 | 211695 | 95.10 |                  |

When vomiting women were compared with non-vomiting women, we found that vomiting in the first trimester produced a significant increase in risk for PTB, with OR=1.08 and 95% CI=1.04~1.13. The relationship still persisted (OR=1.05, 95% CI=1.02~1.09, Table 2) after adjustment for aforementioned confounders. In the additional stratified analyses, the results showed that vomiting in the first trimester was associated with PTB in underweight women (OR=1.08, 95%CI=1.04~1.17) and in women with a normal pre-pregnancy BMI (OR=1.06, 95%CI=1.02~1.11), but not among overweight and obese groups. After adjusting for the same set of confounders, no changes occurred in the results (Table 2).

**Table 2 Association between vomiting and PTB and its association stratified by pre-pregnancy BMI**

|                    | Pre-term<br>n (%) | Full-term<br>n (%) | Unadjusted<br>OR (95% CI) | <i>P</i>         | Adjusted<br>OR (95% CI)* | <i>P</i>                  |
|--------------------|-------------------|--------------------|---------------------------|------------------|--------------------------|---------------------------|
| <b>Vomiting</b>    |                   |                    |                           |                  |                          |                           |
| Yes                | 4978(5.25)        | 89879(94.75)       | 1.075(1.038, 1.112)       | <b>&lt;0.001</b> | 1.051(1.015, 1.088)      | <b>0.0048<sup>a</sup></b> |
| No                 | 10911(4.90)       | 211695(95.10)      | 1.00                      |                  | 1.00                     |                           |
| <b>Underweight</b> |                   |                    |                           |                  |                          |                           |
| <b>Vomiting</b>    |                   |                    |                           |                  |                          |                           |
| Yes                | 810(4.49)         | 17216(95.56)       | 1.077(1.052,1.169)        | <b>0.0042</b>    | 1.080(1.041,1.173)       | <b>0.0082<sup>b</sup></b> |
| No                 | 2308(4.12)        | 53700(95.86)       | 1.00                      |                  | 1.00                     |                           |
| <b>Normal</b>      |                   |                    |                           |                  |                          |                           |
| <b>Vomiting</b>    |                   |                    |                           |                  |                          |                           |
| Yes                | 3610(5.22)        | 65485(94.78)       | 1.061(1.041,1.105)        | <b>0.0048</b>    | 1.059(1.017,1.0103)      | <b>0.0058<sup>b</sup></b> |

1  
2  
3  
4  
5  
6  
7  
8  
9  
10  
11  
12  
13  
14  
15  
16  
17  
18  
19  
20  
21  
22  
23  
24  
25  
26  
27  
28  
29  
30  
31  
32  
33  
34  
35  
36  
37  
38  
39  
40  
41  
42  
43  
44  
45  
46  
47  
48  
49  
50  
51  
52  
53  
54  
55  
56  
57  
58  
59  
60

|                   |            |               |                    |        |                    |                     |
|-------------------|------------|---------------|--------------------|--------|--------------------|---------------------|
| No                | 7473(4.94) | 143761(95.06) | 1.00               |        | 1.00               |                     |
| <b>Overweight</b> |            |               |                    |        |                    |                     |
| <b>Vomiting</b>   |            |               |                    |        |                    |                     |
| Yes               | 462(7.04)  | 6099(92.96)   | 1.023(0.911,1.149) | 0.7012 | 1.011(0.899,1.136) | 0.8547 <sup>b</sup> |
| No                | 898(6.89)  | 12127(93.11)  | 1.00               |        | 1.00               |                     |
| <b>Obese</b>      |            |               |                    |        |                    |                     |
| <b>Vomiting</b>   |            |               |                    |        |                    |                     |
| Yes               | 106(8.95)  | 1079(91.05)   | 0.932(0.731,1.189) | 0.5719 | 0.928(0.727,1.185) | 0.5508 <sup>b</sup> |
| No                | 222(9.53)  | 2107(90.47)   | 1.00               |        | 1.00               |                     |

OR: odds ratio; CI: confidence interval.

<sup>a</sup> Adjusted for maternal age, education, parity, gravidity, pre-pregnancy BMI, and offspring sex;

<sup>b</sup> Adjusted for maternal age, education, parity, gravidity, and offspring sex.

Additionally, we assessed the associations of maternal age, education, parity, gravidity, pre-pregnancy BMI, and offspring sex with risk of PTB. PTB was associated with all of the evaluated exposures (Table S1).

## Discussion

Nausea and vomiting (NVP) while pregnant has far reaching effects on the mental and physical health of mothers and their offspring. Little research has accrued on the association between NVP and PTB in China, especially taking into account pre-pregnancy BMI. This study showed that nearly 30% of Chinese pregnant women had experienced vomiting in the first trimester. The rate of vomiting in Chinese women was somewhat different than in other studies.[9 11 25-27] A Norwegian cohort study reported that the rate of NVP was 33% among 51,675 women with 15 gestational weeks,[9] which was higher than our findings. A previous meta-analysis estimated the rate of NVP in the USA was 68.6% including 23 studies composed of 67,602 women.[11] Conflicting results can likely be explained by heterogeneity of

1  
2  
3  
4 populations, methods, definitions and confounders.

5  
6 Our results showed that socio-demographic factors, such as age, education level,  
7  
8 parity, and gravidity, might influence PTB. Previous studies have indicated that  
9  
10 women with advanced maternal age were associated with increased risk of PTB.[28  
11  
12 29] Araya BM et al. reported that age >35 years, delivery of more than two fetuses,  
13  
14 and <8 years of education were risks factors for PTB.[29] Women aged >35 had  
15  
16 longer exposure times to chronic pathologies and unhealthy lifestyles,[30] and higher  
17  
18 prevalence of maternal obesity in older mothers, which were associated with risks  
19  
20 factors for PTB.[31] Several studies demonstrated that the lower the socio-economic  
21  
22 and education level, the higher the probability of developing infection, and that was  
23  
24 clearly associated with PTB before 30 weeks of gestation.[32 33]  
25  
26  
27  
28  
29  
30

31 In this large cohort study conducted among Chinese women, we have found an  
32  
33 association between vomiting in the first trimester and PTB before 37 weeks of  
34  
35 gestation. When compared with non-vomiting pregnant women, women that  
36  
37 experienced vomiting were at an increased risk of PTB. Our results were inconsistent  
38  
39 with that of other studies.[15 18 34 35] For example, Andrew and Puho indicated that  
40  
41 there was a significant association of vomiting with a decreased risk of PTB,[20] and  
42  
43 Naumann et al. found that vomiting was not associated with PTB.[27] The differences  
44  
45 found among these studies may be attributed to race, definition or classification of  
46  
47 vomiting, and the differential sample sizes of the populations mentioned above.  
48  
49  
50  
51  
52

53 The possible causal link between vomiting and PTB remains elusive. The most  
54  
55 common hypothesis proffered to explain the harmful effects of vomiting is based on  
56  
57  
58  
59  
60

1  
2  
3  
4 the fact that vomiting leads to abnormal digestive function, which results in a lower  
5  
6 nutrient intake of pregnant women.[14 36] Vomiting may also affect maternal and  
7  
8 fetal physiology through dehydration and the modulation of stress-related risk  
9  
10 factors.[37 38] Moreover, vomiting may cause low maternal weight gain during  
11  
12 pregnancy, which has been associated with PTB as reported by Canadian research.[6]  
13  
14

15  
16 Additionally, our results reveal that vomiting was a risk factor for PTB in women  
17  
18 with underweight and normal pre-pregnancy BMI, but not in overweight and obese  
19  
20 women. Previous studies have estimated the risk factors for vomiting and PTB  
21  
22 separately and found different effects of pre-pregnancy BMI on vomiting and  
23  
24 PTB.[39-41] No study has assessed the association between vomiting and PTB by  
25  
26 pre-pregnancy BMI. The biological mechanisms underlying the associations with  
27  
28 maternal pre-pregnancy BMIs remain unclear. Gary et al. indicated that the  
29  
30 relationship between pre-pregnancy BMI and risk of PTB were complex.[23]  
31  
32 Although it was not statistically significant, a trend towards lower risk for PTB in  
33  
34 obese women with vomiting was observed. We speculate that vomiting may have  
35  
36 relatively few impacts on the nutrition of obese women due to their increased  
37  
38 capacity for energy storage.  
39  
40  
41  
42  
43  
44  
45

46  
47 Strengths of this study are as follows. First, this is the first study exploring the  
48  
49 relationship between vomiting in the first trimester and PTB in Chinese women while  
50  
51 assessing the association between PTB and vomiting by pre-pregnancy BMI status.  
52  
53 Second, the data were collected from the large population-based cohort and linked to  
54  
55 the WMCHMIS, providing thorough and detailed access to pregnancy and birth  
56  
57  
58  
59  
60



1  
2  
3  
4 outcomes. Third, with such a large cohort size, many significant associations tend to  
5  
6 appear, and the merit of these in the clinical setting is notable. However, there are two  
7  
8 limitations. One is the reliance on self-reported data on vomiting. Retrospective  
9  
10 evaluation of vomiting symptoms has been reported as a possible source of bias.[42]  
11  
12 The other is that the prevalence of overweight and obesity were relatively low in our  
13  
14 sample (6.17% and 1.10%, respectively) and the relationship between vomiting and  
15  
16 PTB in women with a high pre-pregnancy BMI needs to be further assessed.  
17  
18  
19

### 20 21 **Conclusion**

22  
23 This study showed that vomiting presented an increased risk for PTB based on a large  
24  
25 cohort study in China, although the effect was small. Vomiting was a risk for PTB in  
26  
27 women who were underweight and normal weight based on their pre-pregnancy BMI.  
28  
29 Although no significant association between vomiting and PTB in overweight and  
30  
31 obese women was observed, clinicians should give all women suitable guidance for  
32  
33 dealing with vomiting to ensure improved pregnancy outcomes. Finally, we recognize  
34  
35 the need for greater clarity with respect to the association between vomiting and PTB  
36  
37 and encourage researchers to build on our findings.  
38  
39  
40  
41  
42

### 43 44 **Acknowledgement**

45  
46 We are extremely grateful to all the families who took part in this study, the staff of  
47  
48 the Wuhan Health Bureau, and all the hospitals and community health centers  
49  
50 involved in this study.  
51  
52

### 53 54 **Ethics approval**

55  
56 The Institutional Review Board of Wuhan Medical and Healthcare Center for Women  
57  
58  
59  
60

1  
2  
3  
4 and Children received and approved this study (approved on 10/13/2016).  
5

### 6 **Funding**

7  
8 None.  
9

### 10 **Patient consent**

11  
12 Obtained.  
13

### 14 **Competing interests**

15  
16 None declared.  
17

### 18 **Data sharing statement**

19  
20 No additional data are available.  
21

### 22 **Contribution to authorship**

23  
24 RHH, YWC, BZ designed the research; YWC, YMZ, MZL analyzed data; RHH,  
25  
26 YWC, YL drafted the manuscript; ZMQ, MGW, SQX, TZZ, BZ revised the  
27  
28 manuscript.  
29  
30  
31  
32  
33  
34  
35  
36  
37  
38

### 39 **References**

- 40  
41 1. Flaxman SM, Sherman PW. Morning sickness: a mechanism for protecting mother and embryo. The  
42  
43 Quarterly review of biology 2000;**75**(2):113-48  
44  
45  
46 2. Koren G, Madjunkova S, Maltepe C. The protective effects of nausea and vomiting of pregnancy  
47  
48 against adverse fetal outcome--a systematic review. Reproductive toxicology 2014;**47**:77-80  
49  
50 doi: 10.1016/j.reprotox.2014.05.012[published Online First: Epub Date].  
51  
52  
53 3. Gadsby R, Barnie-Adshead AM, Jagger C. A prospective study of nausea and vomiting during  
54  
55 pregnancy. The British journal of general practice : the journal of the Royal College of  
56  
57  
58  
59  
60

- 1  
2  
3  
4  
5  
6  
7  
8  
9  
10  
11  
12  
13  
14  
15  
16  
17  
18  
19  
20  
21  
22  
23  
24  
25  
26  
27  
28  
29  
30  
31  
32  
33  
34  
35  
36  
37  
38  
39  
40  
41  
42  
43  
44  
45  
46  
47  
48  
49  
50  
51  
52  
53  
54  
55  
56  
57  
58  
59  
60
- General Practitioners 1993;**43**(371):245-8
4. Mazzotta P, Maltepe C, Navioz Y, Magee LA, Koren G. Attitudes, management and consequences of nausea and vomiting of pregnancy in the United States and Canada. *International journal of gynaecology and obstetrics: the official organ of the International Federation of Gynaecology and Obstetrics* 2000;**70**(3):359-65
5. Smith C, Crowther C, Beilby J, Dandeaux J. The impact of nausea and vomiting on women: a burden of early pregnancy. *The Australian & New Zealand journal of obstetrics & gynaecology* 2000;**40**(4):397-401
6. Dodds L, Fell DB, Joseph KS, Allen VM, Butler B. Outcomes of pregnancies complicated by hyperemesis gravidarum. *Obstetrics and gynecology* 2006;**107**(2 Pt 1):285-92 doi: 10.1097/01.AOG.0000195060.22832.cd[published Online First: Epub Date]].
7. Einarson TR, Piwko C, Koren G. Quantifying the global rates of nausea and vomiting of pregnancy: a meta analysis. *Journal of population therapeutics and clinical pharmacology = Journal de la therapeutique des populations et de la pharamcologie clinique* 2013;**20**(2):e171-83
8. Koch KL, Frissora CL. Nausea and vomiting during pregnancy. *Gastroenterology clinics of North America* 2003;**32**(1):201-34, vi
9. Chortatos A, Haugen M, Iversen PO, et al. Pregnancy complications and birth outcomes among women experiencing nausea only or nausea and vomiting during pregnancy in the Norwegian Mother and Child Cohort Study. *BMC Pregnancy Childbirth* 2015;**15**:138 doi: 10.1186/s12884-015-0580-6[published Online First: Epub Date]].
10. Kallen B, Lundberg G, Aberg A. Relationship between vitamin use, smoking, and nausea and vomiting of pregnancy. *Acta obstetricia et gynecologica Scandinavica* 2003;**82**(10):916-20

- 1  
2  
3  
4 11. Einarson TR, Piwko C, Koren G. Prevalence of nausea and vomiting of pregnancy in the USA: a  
5  
6 meta analysis. *Journal of population therapeutics and clinical pharmacology = Journal de la*  
7  
8 *therapeutique des populations et de la pharmacologie clinique* 2013;**20**(2):e163-70  
9  
10  
11 12. Chin RK. Antenatal complications and perinatal outcome in patients with nausea and  
12  
13 vomiting-complicated pregnancy. *European journal of obstetrics, gynecology, and*  
14  
15 *reproductive biology* 1989;**33**(3):215-9  
16  
17  
18 13. Chan OK, Sahota DS, Leung TY, Chan LW, Fung TY, Lau TK. Nausea and vomiting in  
19  
20 health-related quality of life among Chinese pregnant women. *The Australian & New Zealand*  
21  
22 *journal of obstetrics & gynaecology* 2010;**50**(6):512-8 doi:  
23  
24 10.1111/j.1479-828X.2010.01216.x[published Online First: Epub Date]].  
25  
26  
27 14. Birkeland E, Stokke G, Tangvik RJ, et al. Norwegian PUQE (Pregnancy-Unique Quantification of  
28  
29 Emesis and nausea) identifies patients with hyperemesis gravidarum and poor nutritional  
30  
31 intake: a prospective cohort validation study. *PloS one* 2015;**10**(4):e0119962 doi:  
32  
33 10.1371/journal.pone.0119962[published Online First: Epub Date]].  
34  
35  
36 15. Roseboom TJ, Ravelli AC, van der Post JA, Painter RC. Maternal characteristics largely explain  
37  
38 poor pregnancy outcome after hyperemesis gravidarum. *European journal of obstetrics,*  
39  
40 *gynecology, and reproductive biology* 2011;**156**(1):56-9 doi:  
41  
42 10.1016/j.ejogrb.2011.01.010[published Online First: Epub Date]].  
43  
44  
45 16. Chan RL, Olshan AF, Savitz DA, et al. Severity and duration of nausea and vomiting symptoms in  
46  
47 pregnancy and spontaneous abortion. *Human reproduction* 2010;**25**(11):2907-12 doi:  
48  
49 10.1093/humrep/deq260[published Online First: Epub Date]].  
50  
51  
52 17. Paauw JD, Bierling S, Cook CR, Davis AT. Hyperemesis gravidarum and fetal outcome. *JPEN.*  
53  
54  
55  
56  
57  
58  
59  
60

- Journal of parenteral and enteral nutrition 2005;**29**(2):93-6
18. Temming L, Franco A, Istwan N, et al. Adverse pregnancy outcomes in women with nausea and vomiting of pregnancy. The journal of maternal-fetal & neonatal medicine : the official journal of the European Association of Perinatal Medicine, the Federation of Asia and Oceania Perinatal Societies, the International Society of Perinatal Obstet 2014;**27**(1):84-8 doi: 10.3109/14767058.2013.806473[published Online First: Epub Date]].
19. Zhang J, Cai WW. Severe vomiting during pregnancy: antenatal correlates and fetal outcomes. Epidemiology 1991;**2**(6):454-7
20. Czeizel AE, Puho E. Association between severe nausea and vomiting in pregnancy and lower rate of preterm births. Paediatric and perinatal epidemiology 2004;**18**(4):253-9 doi: 10.1111/j.1365-3016.2004.00568.x[published Online First: Epub Date]].
21. Zhou A, Xiong C, Hu R, et al. Pre-Pregnancy BMI, Gestational Weight Gain, and the Risk of Hypertensive Disorders of Pregnancy: A Cohort Study in Wuhan, China. PloS one 2015;**10**(8):e0136291 doi: 10.1371/journal.pone.0136291[published Online First: Epub Date]].
22. Wang Y, Mi J, Shan XY, Wang QJ, Ge KY. Is China facing an obesity epidemic and the consequences? The trends in obesity and chronic disease in China. International journal of obesity (2005) 2007;**31**(1):177-88 doi: 10.1038/sj.ijo.0803354[published Online First: Epub Date]].
23. Shaw GM, Wise PH, Mayo J, et al. Maternal prepregnancy body mass index and risk of spontaneous preterm birth. Paediatric and perinatal epidemiology 2014;**28**(4):302-11 doi: 10.1111/ppe.12125[published Online First: Epub Date]].
24. Vikanes AV, Stoer NC, Magnus P, Grjibovski AM. Hyperemesis gravidarum and pregnancy

- 1  
2  
3  
4 outcomes in the Norwegian Mother and Child Cohort - a cohort study. BMC pregnancy and  
5  
6 childbirth 2013;**13**:169 doi: 10.1186/1471-2393-13-169[published Online First: Epub Date]].  
7  
8  
9 25. Klebanoff MA, Koslowe PA, Kaslow R, Rhoads GG. Epidemiology of vomiting in early pregnancy.  
10  
11 Obstetrics and gynecology 1985;**66**(5):612-6  
12  
13 26. Tierson FD, Olsen CL, Hook EB. Nausea and vomiting of pregnancy and association with  
14  
15 pregnancy outcome. American journal of obstetrics and gynecology 1986;**155**(5):1017-22  
16  
17  
18 27. Naumann CR, Zelig C, Napolitano PG, Ko CW. Nausea, vomiting, and heartburn in pregnancy: a  
19  
20 prospective look at risk, treatment, and outcome. The journal of maternal-fetal & neonatal  
21  
22 medicine : the official journal of the European Association of Perinatal Medicine, the  
23  
24 Federation of Asia and Oceania Perinatal Societies, the International Society of Perinatal  
25  
26 Obstet 2012;**25**(8):1488-93 doi: 10.3109/14767058.2011.644363[published Online First: Epub  
27  
28 Date]].  
29  
30  
31  
32 28. Laopaiboon M, Lumbiganon P, Intarut N, et al. Advanced maternal age and pregnancy outcomes: a  
33  
34 multicountry assessment. BJOG : an international journal of obstetrics and gynaecology  
35  
36 2014;**121 Suppl 1**:49-56 doi: 10.1111/1471-0528.12659[published Online First: Epub Date]].  
37  
38  
39 29. Araya BM, Diaz M, Paredes D, Ortiz J. Association between preterm birth and its subtypes and  
40  
41 maternal sociodemographic characteristics during the post-transitional phase in a developing  
42  
43 country with a very high human development index. Public health 2017;**147**:39-46 doi:  
44  
45 10.1016/j.puhe.2017.01.027[published Online First: Epub Date]].  
46  
47  
48  
49 30. Chen X, Scholl TO. Association of elevated free fatty acids during late pregnancy with preterm  
50  
51 delivery. Obstetrics and gynecology 2008;**112**(2 Pt 1):297-303 doi:  
52  
53 10.1097/AOG.0b013e3181802150[published Online First: Epub Date]].  
54  
55  
56  
57  
58  
59  
60

- 1  
2  
3  
4 31. Passini R, Jr., Cecatti JG, Lajos GJ, et al. Brazilian multicentre study on preterm birth (EMIP):  
5  
6 prevalence and factors associated with spontaneous preterm birth. PloS one  
7  
8 2014;**9**(10):e109069 doi: 10.1371/journal.pone.0109069[published Online First: Epub Date]].  
9  
10  
11 32. Ovalle A, Kakarieka E, Rencoret G, et al. [Risk factors for preterm deliveries in a public hospital].  
12  
13 Revista medica de Chile 2012;**140**(1):19-29 doi: /S0034-98872012000100003[published  
14  
15 Online First: Epub Date]].  
16  
17  
18 33. Goldenberg RL, Culhane JF, Iams JD, Romero R. Epidemiology and causes of preterm birth.  
19  
20 Lancet 2008;**371**(9606):75-84 doi: 10.1016/S0140-6736(08)60074-4[published Online First:  
21  
22 Epub Date]].  
23  
24  
25  
26 34. Veenendaal MV, van Abeelen AF, Painter RC, van der Post JA, Roseboom TJ. Consequences of  
27  
28 hyperemesis gravidarum for offspring: a systematic review and meta-analysis. BJOG : an  
29  
30 international journal of obstetrics and gynaecology 2011;**118**(11):1302-13 doi:  
31  
32 10.1111/j.1471-0528.2011.03023.x[published Online First: Epub Date]].  
33  
34  
35  
36 35. Schiff MA, Reed SD, Daling JR. The sex ratio of pregnancies complicated by hospitalisation for  
37  
38 hyperemesis gravidarum. BJOG : an international journal of obstetrics and gynaecology  
39  
40 2004;**111**(1):27-30  
41  
42  
43  
44 36. Lee J-I, Lee J-A, Lim H-S. Morning sickness reduces dietary diversity, nutrient intakes, and infant  
45  
46 outcome of pregnant women. Nutrition Research 2004;**24**(7):531-40 doi:  
47  
48 10.1016/j.nutres.2003.10.011[published Online First: Epub Date]].  
49  
50  
51 37. Jarnfelt-Samsioe A, Eriksson B, Waldenstrom J, Samsioe G. Some new aspects on emesis  
52  
53 gravidarum. Relations to clinical data, serum electrolytes, total protein and creatinine.  
54  
55 Gynecologic and obstetric investigation 1985;**19**(4):174-86  
56  
57  
58  
59  
60

- 1  
2  
3  
4 38. Haugen M, Vikanes A, Brantsaeter AL, Meltzer HM, Grjibovski AM, Magnus P. Diet before  
5 pregnancy and the risk of hyperemesis gravidarum. *The British journal of nutrition*  
6 2011;**106**(4):596-602 doi: 10.1017/s0007114511000675[published Online First: Epub Date]].  
7  
8  
9  
10  
11 39. Huxley RR. Nausea and vomiting in early pregnancy: its role in placental development. *Obstetrics*  
12 and gynecology 2000;**95**(5):779-82  
13  
14  
15  
16 40. Girsen AI, Mayo JA, Carmichael SL, et al. Women's prepregnancy underweight as a risk factor for  
17 preterm birth: a retrospective study. *BJOG : an international journal of obstetrics and*  
18 *gynaecology* 2016;**123**(12):2001-07 doi: 10.1111/1471-0528.14027[published Online First:  
19 Epub Date]].  
20  
21  
22  
23  
24  
25  
26 41. Pan Y, Zhang S, Wang Q, et al. Investigating the association between prepregnancy body mass  
27 index and adverse pregnancy outcomes: a large cohort study of 536 098 Chinese pregnant  
28 women in rural China. *BMJ open* 2016;**6**(6):e011227 doi:  
29 10.1136/bmjopen-2016-011227[published Online First: Epub Date]].  
30  
31  
32  
33  
34  
35  
36 42. Koren G, Maltepe C, Navioz Y, Wolpin J. Recall bias of the symptoms of nausea and vomiting of  
37 pregnancy. *American journal of obstetrics and gynecology* 2004;**190**(2):485-8 doi:  
38 10.1016/j.ajog.2003.08.039[published Online First: Epub Date].  
39  
40  
41  
42  
43  
44  
45  
46  
47  
48  
49  
50  
51  
52  
53  
54  
55  
56  
57  
58  
59  
60



1  
2  
3  
4  
5  
6  
7  
8  
9  
10  
11  
12  
13  
14  
15  
16  
17  
18  
19  
20  
21  
22  
23  
24  
25  
26  
27  
28  
29  
30  
31  
32  
33  
34  
35  
36  
37  
38  
39  
40  
41  
42  
43  
44  
45  
46  
47  
48  
49  
50  
51  
52  
53  
54  
55  
56  
57  
58  
59  
60

### Figure legends

Figure 1. Flow chart of population selection

For peer review only

1  
2  
3  
4  
5  
6  
7  
8  
9  
10  
11  
12  
13  
14  
15  
16  
17  
18  
19  
20  
21  
22  
23  
24  
25  
26  
27  
28  
29  
30  
31  
32  
33  
34  
35  
36  
37  
38  
39  
40  
41  
42  
43  
44  
45  
46  
47  
48  
49  
50  
51  
52  
53  
54  
55  
56  
57  
58  
59  
60

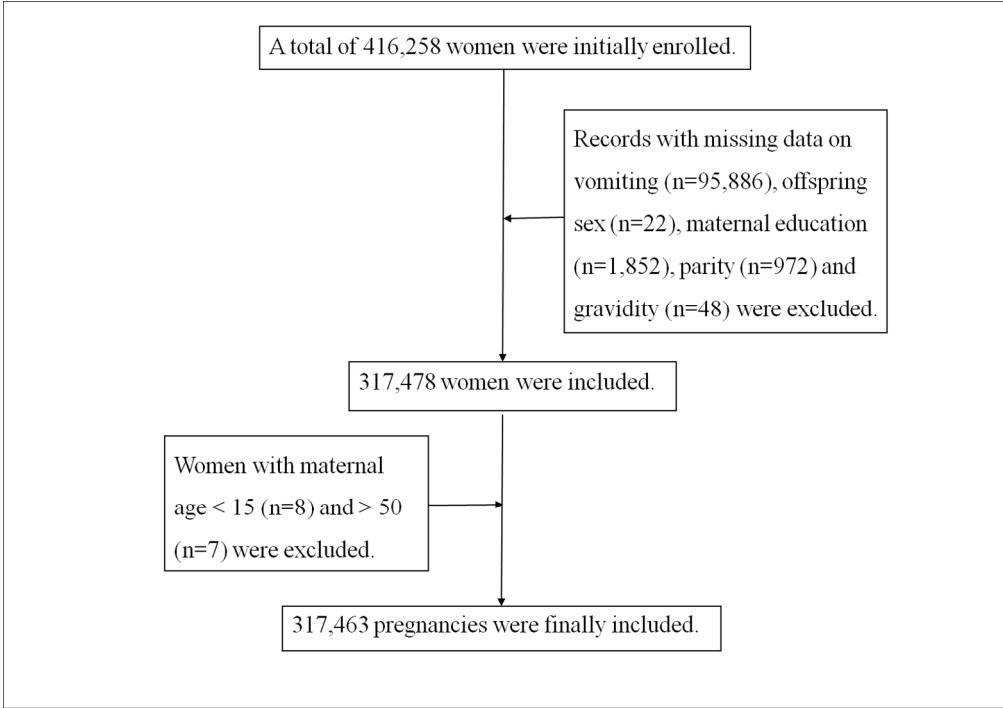

269x190mm (300 x 300 DPI)

ew only

Table S1 Odds ratios (ORs) and 95% confidence intervals (CIs) for preterm birth in relation to maternal and infants' characteristics

|                        | Pre-term<br>n (%) | Full-term<br>n (%) | Unadjusted<br>OR (95% CI) | <i>P</i> | Adjusted<br>OR (95% CI)* | <i>P</i> * |
|------------------------|-------------------|--------------------|---------------------------|----------|--------------------------|------------|
| <b>Age at delivery</b> |                   |                    |                           |          |                          |            |
| <25                    | 3091 (3.62)       | 82224 (96.38)      | 0.69(0.66,0.72)           | <0.001   | 0.79(0.76,0.83)          | <0.001     |
| 25~34                  | 11055 (5.17)      | 202692 (94.83)     | 1.00(Reference)           |          | 1.00(Reference)          |            |
| ≥35                    | 1743 (9.47)       | 16658 (90.53)      | 1.93(1.83,2.03)           | <0.001   | 1.69(1.59,1.78)          | <0.001     |
| <b>Education level</b> |                   |                    |                           |          |                          |            |
| Less than high school  | 3519 (4.55)       | 73737 (95.45)      | 0.97(0.925,1.01)          | 0.1339   | 0.91(0.87,0.95)          | <0.001     |
| High school            | 5010 (4.71)       | 101458 (95.29)     | 1.00(Reference)           |          | 1.00(Reference)          |            |
| College                | 7360 (5.50)       | 126379 (94.50)     | 1.18(1.14,1.22)           | <0.001   | 1.16(1.12,1.21)          | <0.001     |
| <b>Offspring sex</b>   |                   |                    |                           |          |                          |            |
| Male                   | 9188 (5.41)       | 160671 (94.59)     | 1.00(Reference)           |          | 1.00(Reference)          |            |
| Female                 | 6701 (4.54)       | 140903 (95.46)     | 0.83(0.81,0.86)           | <0.001   | 0.84(0.82,0.87)          | <0.001     |
| <b>Parity</b>          |                   |                    |                           |          |                          |            |
| Nullipara              | 11948 (4.65)      | 245121 (95.35)     | 1.00(Reference)           |          | 1.00(Reference)          |            |
| Multipara              | 3941 (6.55)       | 56453 (93.47)      | 1.4(1.38,1.49)            | <0.001   | 1.14(1.09,1.20)          | <0.001     |

|                                            |              |                |                  |        |                  |        |
|--------------------------------------------|--------------|----------------|------------------|--------|------------------|--------|
| <b>Gravidity</b>                           |              |                |                  |        |                  |        |
| <3                                         | 11471 (4.59) | 238259 (95.41) | 1.00(Reference)  |        | 1.00(Reference)  |        |
| ≥3                                         | 4418 (6.52)  | 63315 (93.48)  | 1.45(1.40,1.50)  | <0.001 | 1.211(1.16,1.27) | <0.001 |
| <b>Pre-pregnancy BMI(kg/m<sup>2</sup>)</b> |              |                |                  |        |                  |        |
| Under weight (<18.5)                       | 3118 (4.21)  | 70916 (95.79)  | 0.83(0.80,0.86)  | <0.001 | 0.90(0.86,0.94)  | <0.001 |
| Normal (18.5~23.9)                         | 11083 (5.03) | 209246 (94.97) | 1.00(Reference)  |        | 1.00(Reference)  |        |
| Overweight(24~27.9)                        | 1360 (6.94)  | 18226 (93.06)  | 1.41(1.33,1.50)  | <0.001 | 1.32(1.25,1.40)  | <0.001 |
| Obese(≥28)                                 | 328 (9.33)   | 3186 (90.67)   | 1.96(1.75,2.20)  | <0.001 | 1.86,1.66,2.09)  | <0.001 |
| <b>Vomiting</b>                            |              |                |                  |        |                  |        |
| Yes                                        | 4978 (5.25)  | 89879 (94.75)  | 1.08(1.04, 1.11) |        | 1.05(1.02, 1.09) |        |
| No                                         | 10911 (4.90) | 211695 (95.10) | 1.00(Reference)  | <0.001 | 1.00(Reference)  | 0.0048 |

\* Age at delivery, educational level, offspring sex, parity, gravidity, pre-pregnancy BMI, and vomiting in the first trimester were mutually adjusted.

STROBE Statement—Checklist of items that should be included in reports of *cohort studies*

|                              | Item No | Recommendation                                                                                                                                                                                    | No. of Page |
|------------------------------|---------|---------------------------------------------------------------------------------------------------------------------------------------------------------------------------------------------------|-------------|
| <b>Title and abstract</b>    | 1       | (a) Indicate the study's design with a commonly used term in the title or the abstract                                                                                                            | 1           |
|                              |         | (b) Provide in the abstract an informative and balanced summary of what was done and what was found                                                                                               | 2-3         |
| <b>Introduction</b>          |         |                                                                                                                                                                                                   |             |
| Background/rationale         | 2       | Explain the scientific background and rationale for the investigation being reported                                                                                                              | 4-5         |
| Objectives                   | 3       | State specific objectives, including any prespecified hypotheses                                                                                                                                  | 5           |
| <b>Methods</b>               |         |                                                                                                                                                                                                   |             |
| Study design                 | 4       | Present key elements of study design early in the paper                                                                                                                                           | 6           |
| Setting                      | 5       | Describe the setting, locations, and relevant dates, including periods of recruitment, exposure, follow-up, and data collection                                                                   | 6           |
| Participants                 | 6       | (a) Give the eligibility criteria, and the sources and methods of selection of participants. Describe methods of follow-up                                                                        | 6           |
|                              |         | (b) For matched studies, give matching criteria and number of exposed and unexposed                                                                                                               | 6           |
| Variables                    | 7       | Clearly define all outcomes, exposures, predictors, potential confounders, and effect modifiers. Give diagnostic criteria, if applicable                                                          | 6           |
| Data sources/<br>measurement | 8*      | For each variable of interest, give sources of data and details of methods of assessment (measurement). Describe comparability of assessment methods if there is more than one group              | 6-7         |
| Bias                         | 9       | Describe any efforts to address potential sources of bias                                                                                                                                         | 6           |
| Study size                   | 10      | Explain how the study size was arrived at                                                                                                                                                         | 6           |
| Quantitative variables       | 11      | Explain how quantitative variables were handled in the analyses. If applicable, describe which groupings were chosen and why                                                                      | 7           |
| Statistical methods          | 12      | (a) Describe all statistical methods, including those used to control for confounding                                                                                                             | 7           |
|                              |         | (b) Describe any methods used to examine subgroups and interactions                                                                                                                               | 7           |
|                              |         | (c) Explain how missing data were addressed                                                                                                                                                       | 6           |
|                              |         | (d) If applicable, explain how loss to follow-up was addressed                                                                                                                                    | NR          |
|                              |         | (e) Describe any sensitivity analyses                                                                                                                                                             | NR          |
| <b>Results</b>               |         |                                                                                                                                                                                                   |             |
| Participants                 | 13*     | (a) Report numbers of individuals at each stage of study—eg numbers potentially eligible, examined for eligibility, confirmed eligible, included in the study, completing follow-up, and analysed | 7-8         |
|                              |         | (b) Give reasons for non-participation at each stage                                                                                                                                              | 8           |
|                              |         | (c) Consider use of a flow diagram                                                                                                                                                                | 7           |
| Descriptive data             | 14*     | (a) Give characteristics of study participants (eg demographic, clinical, social) and information on exposures and potential confounders                                                          | 7-8         |
|                              |         | (b) Indicate number of participants with missing data for each variable of interest                                                                                                               | 8           |
|                              |         | (c) Summarise follow-up time (eg, average and total amount)                                                                                                                                       | 8           |
| Outcome data                 | 15*     | Report numbers of outcome events or summary measures over time                                                                                                                                    | 7-8         |
| Main results                 | 16      | (a) Give unadjusted estimates and, if applicable, confounder-adjusted estimates and their precision (eg, 95% confidence interval). Make clear                                                     | 8-9         |

|    |                          |                                                                                 |       |
|----|--------------------------|---------------------------------------------------------------------------------|-------|
| 1  |                          | which confounders were adjusted for and why they were included                  |       |
| 2  |                          | (b) Report category boundaries when continuous variables were                   | 8     |
| 3  |                          | categorized                                                                     |       |
| 4  |                          | (c) If relevant, consider translating estimates of relative risk into absolute  | 9     |
| 5  |                          | risk for a meaningful time period                                               |       |
| 6  |                          |                                                                                 |       |
| 7  | Other analyses           | 17 Report other analyses done—eg analyses of subgroups and interactions,        | 9     |
| 8  |                          | and sensitivity analyses                                                        |       |
| 9  |                          |                                                                                 |       |
| 10 | <b>Discussion</b>        |                                                                                 |       |
| 11 | Key results              | 18 Summarise key results with reference to study objectives                     | 10-11 |
| 12 | Limitations              | 19 Discuss limitations of the study, taking into account sources of potential   |       |
| 13 |                          | bias or imprecision. Discuss both direction and magnitude of any potential      |       |
| 14 |                          | bias                                                                            |       |
| 15 |                          |                                                                                 |       |
| 16 | Interpretation           | 20 Give a cautious overall interpretation of results considering objectives,    | 12    |
| 17 |                          | limitations, multiplicity of analyses, results from similar studies, and other  |       |
| 18 |                          | relevant evidence                                                               |       |
| 19 |                          |                                                                                 |       |
| 20 | Generalisability         | 21 Discuss the generalisability (external validity) of the study results        | 12    |
| 21 |                          |                                                                                 |       |
| 22 | <b>Other information</b> |                                                                                 |       |
| 23 | Funding                  | 22 Give the source of funding and the role of the funders for the present study | 13    |
| 24 |                          | and, if applicable, for the original study on which the present article is      |       |
| 25 |                          | based                                                                           |       |
| 26 |                          |                                                                                 |       |

\*Give information separately for exposed and unexposed groups.

**Note:** An Explanation and Elaboration article discusses each checklist item and gives methodological background and published examples of transparent reporting. The STROBE checklist is best used in conjunction with this article (freely available on the Web sites of PLoS Medicine at <http://www.plosmedicine.org/>, Annals of Internal Medicine at <http://www.annals.org/>, and Epidemiology at <http://www.epidem.com/>). Information on the STROBE Initiative is available at <http://www.strobe-statement.org>.

# BMJ Open

## Association between vomiting in the first trimester and preterm birth: a retrospective birth cohort study in Wuhan, China

|                                 |                                                                                                                                                                                                                                                                                                                                                                                                                                                                                                                                                                                                                                                                                                                                                                                                                                                                                                                                                                                                                                                                                                                                                                                                                                                                                                                                                                                                                                                                                                                                                                              |
|---------------------------------|------------------------------------------------------------------------------------------------------------------------------------------------------------------------------------------------------------------------------------------------------------------------------------------------------------------------------------------------------------------------------------------------------------------------------------------------------------------------------------------------------------------------------------------------------------------------------------------------------------------------------------------------------------------------------------------------------------------------------------------------------------------------------------------------------------------------------------------------------------------------------------------------------------------------------------------------------------------------------------------------------------------------------------------------------------------------------------------------------------------------------------------------------------------------------------------------------------------------------------------------------------------------------------------------------------------------------------------------------------------------------------------------------------------------------------------------------------------------------------------------------------------------------------------------------------------------------|
| Journal:                        | <i>BMJ Open</i>                                                                                                                                                                                                                                                                                                                                                                                                                                                                                                                                                                                                                                                                                                                                                                                                                                                                                                                                                                                                                                                                                                                                                                                                                                                                                                                                                                                                                                                                                                                                                              |
| Manuscript ID                   | bmjopen-2017-017309.R3                                                                                                                                                                                                                                                                                                                                                                                                                                                                                                                                                                                                                                                                                                                                                                                                                                                                                                                                                                                                                                                                                                                                                                                                                                                                                                                                                                                                                                                                                                                                                       |
| Article Type:                   | Research                                                                                                                                                                                                                                                                                                                                                                                                                                                                                                                                                                                                                                                                                                                                                                                                                                                                                                                                                                                                                                                                                                                                                                                                                                                                                                                                                                                                                                                                                                                                                                     |
| Date Submitted by the Author:   | 12-Aug-2017                                                                                                                                                                                                                                                                                                                                                                                                                                                                                                                                                                                                                                                                                                                                                                                                                                                                                                                                                                                                                                                                                                                                                                                                                                                                                                                                                                                                                                                                                                                                                                  |
| Complete List of Authors:       | <p>Hu, Ronghua; Wuhan Children's Hospital (Wuhan Maternal and Child Healthcare Hospital), Tongji Medical College, Huazhong University of Science and Technology</p> <p>Chen, Yawen; Wuhan Children's Hospital (Wuhan Maternal and Child Healthcare Hospital), Tongji Medical College, Huazhong University of Science and Technology</p> <p>Zhang, Yiming; Wuhan Children's Hospital (Wuhan Maternal and Child Healthcare Hospital), Tongji Medical College, Huazhong University of Science and Technology</p> <p>Qian, Zhengmin ; Saint Louis University, Department of Epidemiology, School of Public Health</p> <p>Liu, Yan; Wuhan Children's Hospital (Wuhan Maternal and Child Healthcare Hospital), Tongji Medical College, Huazhong University of Science and Technology</p> <p>Vaughn, MG; Saint Louis University, School of Social Work</p> <p>Xu, Shunqing; Tongji Medical College, Huazhong University of Science and Technology, Key Laboratory of Environment and Health, Ministry of Education &amp; Ministry of Environmental Protection, and State Key Laboratory of Environmental Health, School of Public Health</p> <p>Zheng, Tongzhang; Brown University, Department of Epidemiology, School of Public Health</p> <p>Liu, Mingzhu; Wuhan Children's Hospital (Wuhan Maternal and Child Healthcare Hospital), Tongji Medical College, Huazhong University of Science and Technology</p> <p>Zhang, Bin; Wuhan Children's Hospital (Wuhan Maternal and Child Healthcare Hospital), Tongji Medical College, Huazhong University of Science and Technology</p> |
| <b>Primary Subject Heading</b>: | Epidemiology                                                                                                                                                                                                                                                                                                                                                                                                                                                                                                                                                                                                                                                                                                                                                                                                                                                                                                                                                                                                                                                                                                                                                                                                                                                                                                                                                                                                                                                                                                                                                                 |
| Secondary Subject Heading:      | Epidemiology                                                                                                                                                                                                                                                                                                                                                                                                                                                                                                                                                                                                                                                                                                                                                                                                                                                                                                                                                                                                                                                                                                                                                                                                                                                                                                                                                                                                                                                                                                                                                                 |
| Keywords:                       | vomiting, preterm birth, pre-pregnancy body mass index                                                                                                                                                                                                                                                                                                                                                                                                                                                                                                                                                                                                                                                                                                                                                                                                                                                                                                                                                                                                                                                                                                                                                                                                                                                                                                                                                                                                                                                                                                                       |

1  
2  
3  
4  
5  
6  
7  
8  
9  
10  
11  
12  
13  
14  
15  
16  
17  
18  
19  
20  
21  
22  
23  
24  
25  
26  
27  
28  
29  
30  
31  
32  
33  
34  
35  
36  
37  
38  
39  
40  
41  
42  
43  
44  
45  
46  
47  
48  
49  
50  
51  
52  
53  
54  
55  
56  
57  
58  
59  
60

For peer review only



1  
2  
3  
4  
5  
6  
7  
8  
9  
10  
11  
12  
13  
14  
15  
16  
17  
18  
19  
20  
21  
22  
23  
24  
25  
26  
27  
28  
29  
30  
31  
32  
33  
34  
35  
36  
37  
38  
39  
40  
41  
42  
43  
44  
45  
46  
47  
48  
49  
50  
51  
52  
53  
54  
55  
56  
57  
58  
59  
60

**Association between vomiting in the first trimester and preterm birth:  
a retrospective birth cohort study in Wuhan, China**

Ronghua Hu<sup>1§</sup>, Yawen Chen<sup>1§</sup>, Yiming Zhang<sup>1</sup>, Zhengmin Qian<sup>2</sup>, Yan Liu<sup>1</sup>, Michael  
G. Vaughn<sup>2</sup>, Shunqing Xu<sup>3</sup>, Tongzhang Zheng<sup>4</sup>, Mingzhu Liu<sup>1</sup>, Bin Zhang<sup>1\*</sup>

<sup>1</sup> Wuhan Children's Hospital (Wuhan Maternal and Child Healthcare Hospital), Tongji  
Medical College, Huazhong University of Science and Technology, Wuhan, Hubei,  
People's Republic of China

<sup>2</sup> Department of Epidemiology, College for Public Health and Social Justice, Saint  
Louis University, MO, United States of America

<sup>3</sup> Key Laboratory of Environment and Health, School of Public Health, Tongji  
Medical College, Huazhong University of Science and Technology, Wuhan, Hubei,  
People's Republic of China

<sup>4</sup> Department of Epidemiology, School of Public Health, Providence, Brown  
University, RI, United States of America

<sup>§</sup> These authors contributed equally to this work

**\*Corresponding author**

Full name: Bin Zhang

Postal address: No.100 Hongkong Road, Wuhan 430014, Hubei, China,

E-mail: mchwhzb@163.com

Telephone and fax number: +86-027-82433149

## Abstract

**Objective:** Although vomiting in the first trimester has been reported to be associated with preterm birth (PTB), findings supporting this association remain inconsistent. Our aim was to assess the association between vomiting and PTB, as well as evaluate if the association is modified by pre-pregnancy body mass index (BMI).

**Design:** A retrospective cohort study.

**Setting:** Wuhan, a central city of China.

**Participants:** A total of 317,463 pregnant women who had a live, singleton newborn from January 1, 2010, to May 23, 2016 were enrolled in our study.

**Main outcome measure:** PTB was defined as gestational age <37 gestational weeks. Gestational age was calculated using reports from mothers based on the first day of their last menstrual period. An ultrasound was routinely used to determine gestational age before 12 gestational weeks.

**Results:** Of the 317,463 pregnant women, 29.88% (94,857) experienced vomiting in the first trimester and 5.00% (15,889) experienced a PTB. Vomiting in the first trimester increased the risk for PTB and the multivariable adjusted odds ratio (OR) was 1.05 (95% confidence interval (CI) = 1.02~1.09). In the stratified analyses, the association of vomiting in the first trimester was significant among underweight women (adjusted OR=1.08, 95%CI=1.04~1.17) and normal pre-pregnancy BMI women (adjusted OR=1.06, 95%CI=1.02~1.11), but not in overweight women (adjusted OR=1.01, 95% CI=0.90~1.14) and obese women (adjusted OR=0.93, 95% CI=0.73~1.19).

1  
2  
3  
4 **Conclusions:** Our study indicates that vomiting in the first trimester was associated  
5  
6 with PTB. Additionally, women with underweight and normal pre-pregnancy BMI  
7  
8 that experienced vomiting are more likely to have a PTB.  
9

10  
11 **Keywords:** vomiting; preterm birth; pre-pregnancy body mass index  
12  
13

#### 14 15 16 **Strengths and limitations of this study** 17

- 18 1. The present study is a cohort study enrolled a large population of 317,463 pregnant  
19 women.  
20  
21
- 22 2. This is the first study exploring the relationship between vomiting in the first  
23 trimester and PTB in Chinese women by pre-pregnancy BMI status.  
24  
25
- 26 3. Vomiting symptoms was based on self-reported, which may be a possible source of  
27 bias.  
28  
29
- 30 4. The prevalence of overweight and obesity were relatively low in our sample, and  
31 the relationship between vomiting and PTB in women with a high pre-pregnancy BMI  
32 needs to be further assessed.  
33  
34  
35  
36  
37  
38  
39  
40  
41  
42  
43  
44  
45  
46  
47  
48  
49  
50  
51  
52  
53  
54  
55  
56  
57  
58  
59  
60

## Introduction

Nausea and vomiting in pregnancy (NVP) is a collection of symptoms composed of nausea alone, or nausea in combination with vomiting.[1] This condition typically starts prior to 9 weeks of gestation and subsides by the end of the first trimester; however, this condition has been shown to continue into the second trimester in up to 25% of pregnant women and for 0.3-2.3% into the third trimester.[2] NVP has an important effect on both individuals and society as it causes emotional distress, depression, and can have a negative effect on a woman's activities and relationships.[3 4] NVP also has been found to lead to loss of time at work and a decrease in job productivity.[5] The etiology of NVP remains unknown, although it is currently believed to be related to early pregnancy hormones.[6]

Almost 70% of women worldwide experience NVP.[7] The average rate of vomiting only in early pregnancy is 47.1%, and the reported rates generally range from 22.3% to 63.5%.[8] A Norwegian cohort investigation reported that the rate of NVP was 33% among 51,675 women.[9] Källén et al. studied the occurrence of NVP via questionnaires in 3,675 Swedish pregnant women and observed that 38.3% of pregnant women reported vomiting in early pregnancy.[10] One previous meta-analysis, which included 23 studies comprised of 67,602 women,[11] estimated the rate of NVP in the USA to be as high as 68.6%. Meanwhile, studies on the rate of NVP in China are few and are limited by their small sample sizes. Chin et al.[12] conducted a study in a district hospital in Hong Kong in 1989 and found that the incidence of NVP was 74.9% among 1,453 patients. Another cross-sectional study

1  
2  
3  
4 conducted in a University obstetric unit in Hong Kong revealed that the prevalence of  
5  
6 NVP was 90.9% among 396 women.[13]  
7

8  
9 In previous studies, NVP was not found to be associated with primary maternal  
10  
11 diseases such as gastrointestinal infections or allergies.[8] Recently there was a  
12  
13 resurgence of interest in topics related to NVP, such as death,[14] pregnancy  
14  
15 complications,[15] and birth outcomes.[16] Some studies reported that women with  
16  
17 NVP were more likely to have a preterm birth (PTB) compared with symptom- free  
18  
19 women.[15 17 18] Still, other studies have found no association between this  
20  
21 phenomenon.[6 19] However, Czeizel and Puho have suggested that women with  
22  
23 NVP had a lower risk of PTB.[20] A Norway prospective cohort study involving  
24  
25 51,675 pregnant women found nausea to decrease the risk for PTB by 14% but did not  
26  
27 find NVP associated with PTB.[9]  
28  
29  
30  
31  
32

33  
34 To our knowledge, there has been only one case-control study, which was  
35  
36 conducted in Chinese pregnant women that addressed the relationship between PTB  
37  
38 and a severe form of NVP called *Hyperemesis Gravidarum*. [19] Information about the  
39  
40 association between vomiting in the first trimester and risk of PTB in China is unclear.  
41  
42 Furthermore, there has not been a study in which the population was grouped  
43  
44 according to pre-pregnancy BMI to determine its contribution to the identification of  
45  
46 the association between NVP and risk of PTB. Thus, our objective in the present study  
47  
48 is to explore the association between vomiting in the first trimester and PTB as well  
49  
50 as assess whether pre-pregnancy BMI modifies this association using a birth cohort  
51  
52 study in Wuhan, China.  
53  
54  
55  
56  
57  
58  
59  
60

## Materials and methods

### *Study population*

A retrospective cohort study was conducted in Wuhan China, utilizing data from the Wuhan Maternal and Child Health Management Information System (WMCHMIS). The WMCHMIS was introduced in our previous study.[21] Enrolled women included every pregnant woman who had a live, singleton newborn from January 1, 2010, to May 23, 2016. The study has been approved by the Wuhan Medical and Healthcare Center for Women and Children.

A total of 416,258 women were initially enrolled. We then excluded records with missing data on vomiting (n=95,886), offspring sex (n=22), maternal education (n=1,852), parity (n=972), and gravidity (n=48). Moreover, we also excluded those with a maternal age less than 15 (n=8) and more than 50 (n=7). The final study population consisted of 317,463 pregnancies or 76.27% of the initial population.

### *Variables*

Vomiting in the first trimester was assessed when pregnant women first visited the women and children healthcare centers. Maternal age, education, parity, gravidity, pre-pregnancy weight, and height were self-reported at their first antenatal care visit while offspring sex and other obstetric information were provided by midwives documented in WMCHMIS. Information was audited by clinicians and obstetric nurses, and a warning would be activated when illogical data were input into WMCHMIS.

Vomiting was dichotomized into yes and no response formats. Maternal age was

1  
2  
3  
4 categorized into 3 groups: younger than 25, 25~34 years old, and 35 years old and  
5  
6 older. A proxy for socioeconomic status was the maternal education which was  
7  
8 categorized into 3 groups: less than high school, high school, and college. By parity,  
9  
10 women were dichotomized into nullipara and multipara. Regarding gravidity, it was  
11  
12 divided into less than 3 times and 3 times and more. Pre-pregnancy BMI was  
13  
14 calculated as  $\text{weight}/\text{height}^2$  and grouped into 4 categories according to Chinese  
15  
16 standard of weight for adults.[22]  
17  
18  
19

20  
21 The main outcome variable was PTB. PTB was defined as gestational age <37  
22  
23 gestational weeks.[23] Gestational age was calculated using reports from mothers  
24  
25 based on the first day of their last menstrual period. An ultrasound was routinely used  
26  
27 to determine gestational age before 12 gestational weeks.  
28  
29

### 30 31 *Statistical analysis*

32  
33 Results were presented as frequencies (%). Difference between PTB group and  
34  
35 full-term group were assessed by Chi-square tests. A logistic regression model was  
36  
37 used to estimate the association between vomiting in the first trimester and PTB.  
38  
39 Results were adjusted for confounders including maternal age, education, parity,  
40  
41 gravidity, pre-pregnancy BMI, and offspring sex in accord with previous studies.[9 24]  
42  
43 We also employed a stratified analysis by pre-pregnancy BMI and the confounders  
44  
45 adjusted in stratified analysis were maternal age, education, parity, gravidity, and  
46  
47 offspring sex. Crude and adjusted odds ratios (ORs) statistics, as well as a 95%  
48  
49 confidence interval (CI) were calculated. All statistical analyses were performed using  
50  
51 SAS version 9.2 (SAS Statistical Institute, Inc., Cary, NC).  
52  
53  
54  
55  
56  
57  
58  
59  
60

## Results

In 317,463 pregnancies included in our study (Figure 1), gestational age ranged from 28 weeks to 43 weeks. Altogether, 94,857 out of 317,463 pregnant women (29.88%) reported vomiting in the first trimester. And 5.00% (15,889) of the births were delivered preterm. Maternal demographics and characteristics are shown in Table 1. Women who were older than 35 years old, had a college education, were multipara, had more than 3 times gravidity, or had a higher pre-pregnancy BMI were more likely to have a PTB. PTB was observed to be more common in female babies than in male offspring.

**Table 1. Characteristics of women and infants**

|                                            | Preterm<br>(n=15,889, 5.00%) |      | Full-term<br>(n=301,574, 95.00%) |       | P      |
|--------------------------------------------|------------------------------|------|----------------------------------|-------|--------|
|                                            | n                            | %    | n                                | %     |        |
| <b>Age at delivery</b>                     |                              |      |                                  |       |        |
| <25                                        | 3091                         | 3.62 | 82224                            | 96.38 |        |
| 25~34                                      | 11055                        | 5.17 | 202692                           | 94.83 | <0.001 |
| ≥35                                        | 1743                         | 9.47 | 16658                            | 90.53 |        |
| <b>Education level</b>                     |                              |      |                                  |       |        |
| Less than high school                      | 3519                         | 4.55 | 73737                            | 95.45 |        |
| High school                                | 5010                         | 4.71 | 101458                           | 95.29 | <0.001 |
| College                                    | 7360                         | 5.50 | 126379                           | 94.50 |        |
| <b>Offspring sex</b>                       |                              |      |                                  |       |        |
| Male                                       | 9188                         | 5.41 | 160671                           | 94.59 |        |
| Female                                     | 6701                         | 4.54 | 140903                           | 95.46 | <0.001 |
| <b>Parity</b>                              |                              |      |                                  |       |        |
| Nullipara                                  | 11948                        | 4.65 | 245121                           | 95.35 |        |
| Multipara                                  | 3941                         | 6.53 | 56453                            | 93.47 | <0.001 |
| <b>Gravidity</b>                           |                              |      |                                  |       |        |
| <3                                         | 11471                        | 4.59 | 238259                           | 95.41 |        |
| ≥3                                         | 4418                         | 6.52 | 63315                            | 93.48 | <0.001 |
| <b>Pre-pregnancy BMI(kg/m<sup>2</sup>)</b> |                              |      |                                  |       |        |



|                     |       |      |        |       |                  |
|---------------------|-------|------|--------|-------|------------------|
| Underweight (<18.5) | 3118  | 4.21 | 70916  | 95.79 |                  |
| Normal (18.5~23.9)  | 11083 | 5.03 | 209246 | 94.97 | <b>&lt;0.001</b> |
| Overweight(24~27.9) | 1360  | 6.94 | 18226  | 93.06 |                  |
| Obese( $\geq$ 28)   | 328   | 9.33 | 3186   | 90.67 |                  |
| <b>Vomiting</b>     |       |      |        |       |                  |
| Yes                 | 4978  | 5.25 | 89879  | 94.75 | <b>&lt;0.001</b> |
| No                  | 10911 | 4.90 | 211695 | 95.10 |                  |

When vomiting women were compared with non-vomiting women, we found that vomiting in the first trimester produced a significant increase in risk for PTB, with OR=1.08 and 95% CI=1.04~1.13. The relationship still persisted (OR=1.05, 95% CI=1.02~1.09, Table 2) after adjustment for aforementioned confounders. In the additional stratified analyses, the results showed that vomiting in the first trimester was associated with PTB in underweight women (OR=1.08, 95%CI=1.04~1.17) and in women with a normal pre-pregnancy BMI (OR=1.06, 95%CI=1.02~1.11), but not among overweight and obese groups. After adjusting for the same set of confounders, no changes occurred in the results (Table 2).

**Table 2 Association between vomiting and PTB and its association stratified by pre-pregnancy BMI**

|                    | Pre-term<br>n (%) | Full-term<br>n (%) | Unadjusted<br>OR (95% CI) | <i>P</i>         | Adjusted<br>OR (95% CI)* | <i>P</i>                  |
|--------------------|-------------------|--------------------|---------------------------|------------------|--------------------------|---------------------------|
| <b>Vomiting</b>    |                   |                    |                           |                  |                          |                           |
| Yes                | 4978(5.25)        | 89879(94.75)       | 1.08(1.04, 1.11)          | <b>&lt;0.001</b> | 1.05(1.02, 1.09)         | <b>0.0048<sup>a</sup></b> |
| No                 | 10911(4.90)       | 211695(95.10)      | 1.00                      |                  | 1.00                     |                           |
| <b>Underweight</b> |                   |                    |                           |                  |                          |                           |
| <b>Vomiting</b>    |                   |                    |                           |                  |                          |                           |
| Yes                | 810(4.49)         | 17216(95.56)       | 1.08(1.05,1.17)           | <b>0.0042</b>    | 1.08(1.04,1.17)          | <b>0.0082<sup>b</sup></b> |
| No                 | 2308(4.12)        | 53700(95.86)       | 1.00                      |                  | 1.00                     |                           |
| <b>Normal</b>      |                   |                    |                           |                  |                          |                           |
| <b>Vomiting</b>    |                   |                    |                           |                  |                          |                           |
| Yes                | 3610(5.22)        | 65485(94.78)       | 1.06(1.04,1.11)           | <b>0.0048</b>    | 1.06(1.02,1.01)          | <b>0.0058<sup>b</sup></b> |

1  
2  
3  
4  
5  
6  
7  
8  
9  
10  
11  
12  
13  
14  
15  
16  
17  
18  
19  
20  
21  
22  
23  
24  
25  
26  
27  
28  
29  
30  
31  
32  
33  
34  
35  
36  
37  
38  
39  
40  
41  
42  
43  
44  
45  
46  
47  
48  
49  
50  
51  
52  
53  
54  
55  
56  
57  
58  
59  
60

|                   |            |               |                 |        |                 |                     |
|-------------------|------------|---------------|-----------------|--------|-----------------|---------------------|
| No                | 7473(4.94) | 143761(95.06) | 1.00            |        | 1.00            |                     |
| <b>Overweight</b> |            |               |                 |        |                 |                     |
| <b>Vomiting</b>   |            |               |                 |        |                 |                     |
| Yes               | 462(7.04)  | 6099(92.96)   | 1.02(0.91,1.15) | 0.7012 | 1.01(0.90,1.14) | 0.8547 <sup>b</sup> |
| No                | 898(6.89)  | 12127(93.11)  | 1.00            |        | 1.00            |                     |
| <b>Obese</b>      |            |               |                 |        |                 |                     |
| <b>Vomiting</b>   |            |               |                 |        |                 |                     |
| Yes               | 106(8.95)  | 1079(91.05)   | 0.93(0.73,1.19) | 0.5719 | 0.93(0.73,1.19) | 0.5508 <sup>b</sup> |
| No                | 222(9.53)  | 2107(90.47)   | 1.00            |        | 1.00            |                     |

OR: odds ratio; CI: confidence interval.

<sup>a</sup> Adjusted for maternal age, education, parity, gravidity, pre-pregnancy BMI, and offspring sex;

<sup>b</sup> Adjusted for maternal age, education, parity, gravidity, and offspring sex.

Additionally, we assessed the associations of maternal age, education, parity, gravidity, pre-pregnancy BMI, and offspring sex with risk of PTB. PTB was associated with all of the evaluated exposures (Table S1).

## Discussion

Nausea and vomiting (NVP) while pregnant has far reaching effects on the mental and physical health of mothers and their offspring. Little research has accrued on the association between NVP and PTB in China, especially taking into account pre-pregnancy BMI. This study showed that nearly 30% of Chinese pregnant women had experienced vomiting in the first trimester. The rate of vomiting in Chinese women was somewhat different than in other studies.[9 11 25-27] A Norwegian cohort study reported that the rate of NVP was 33% among 51,675 women with 15 gestational weeks,[9] which was higher than our findings. A previous meta-analysis estimated the rate of NVP in the USA was 68.6% including 23 studies composed of 67,602 women.[11] Conflicting results can likely be explained by heterogeneity of

1  
2  
3  
4 populations, methods, definitions and confounders.

5  
6 Our results showed that socio-demographic factors, such as age, education level,  
7  
8 parity, and gravidity, might influence PTB. Previous studies have indicated that  
9  
10 women with advanced maternal age were associated with increased risk of PTB.[28  
11  
12 29] Araya BM et al. reported that age >35 years, delivery of more than two fetuses,  
13  
14 and <8 years of education were risks factors for PTB.[29] Women aged >35 had  
15  
16 longer exposure times to chronic pathologies and unhealthy lifestyles,[30] and higher  
17  
18 prevalence of maternal obesity in older mothers, which were associated with risks  
19  
20 factors for PTB.[31] Several studies demonstrated that the lower the socio-economic  
21  
22 and education level, the higher the probability of developing infection, and that was  
23  
24 clearly associated with PTB before 30 weeks of gestation.[32 33]  
25  
26  
27  
28  
29  
30

31 In this large cohort study conducted among Chinese women, we have found an  
32  
33 association between vomiting in the first trimester and PTB before 37 weeks of  
34  
35 gestation. When compared with non-vomiting pregnant women, women that  
36  
37 experienced vomiting were at an increased risk of PTB. Our results were inconsistent  
38  
39 with that of other studies.[15 18 34 35] For example, Andrew and Puho indicated that  
40  
41 there was a significant association of vomiting with a decreased risk of PTB,[20] and  
42  
43 Naumann et al. found that vomiting was not associated with PTB.[27] The differences  
44  
45 found among these studies may be attributed to race, definition or classification of  
46  
47 vomiting, and the differential sample sizes of the populations mentioned above.  
48  
49  
50  
51  
52

53 The possible causal link between vomiting and PTB remains elusive. The most  
54  
55 common hypothesis proffered to explain the harmful effects of vomiting is based on  
56  
57  
58  
59  
60

1  
2  
3  
4 the fact that vomiting leads to abnormal digestive function, which results in a lower  
5  
6 nutrient intake of pregnant women.[14 36] Vomiting may also affect maternal and  
7  
8 fetal physiology through dehydration and the modulation of stress-related risk  
9  
10 factors.[37 38] Moreover, vomiting may cause low maternal weight gain during  
11  
12 pregnancy, which has been associated with PTB as reported by Canadian research.[6]  
13  
14

15  
16 Additionally, our results reveal that vomiting was a risk factor for PTB in women  
17  
18 with underweight and normal pre-pregnancy BMI, but not in overweight and obese  
19  
20 women. Previous studies have estimated the risk factors for vomiting and PTB  
21  
22 separately and found different effects of pre-pregnancy BMI on vomiting and  
23  
24 PTB.[39-41] No study has assessed the association between vomiting and PTB by  
25  
26 pre-pregnancy BMI. The biological mechanisms underlying the associations with  
27  
28 maternal pre-pregnancy BMIs remain unclear. Gary et al. indicated that the  
29  
30 relationship between pre-pregnancy BMI and risk of PTB were complex.[23]  
31  
32 Although it was not statistically significant, a trend towards lower risk for PTB in  
33  
34 obese women with vomiting was observed. We speculate that vomiting may have  
35  
36 relatively few impacts on the nutrition of obese women due to their increased  
37  
38 capacity for energy storage.  
39  
40  
41  
42  
43  
44  
45

46  
47 Strengths of this study are as follows. First, this is the first study exploring the  
48  
49 relationship between vomiting in the first trimester and PTB in Chinese women while  
50  
51 assessing the association between PTB and vomiting by pre-pregnancy BMI status.  
52  
53  
54 Second, the data were collected from the large population-based cohort and linked to  
55  
56 the WMCHMIS, providing thorough and detailed access to pregnancy and birth  
57  
58  
59  
60

1  
2  
3  
4 outcomes. Third, with such a large cohort size, many significant associations tend to  
5  
6 appear, and the merit of these in the clinical setting is notable. However, there are two  
7  
8 limitations. One is the reliance on self-reported data on vomiting. Retrospective  
9  
10 evaluation of vomiting symptoms has been reported as a possible source of bias.[42]  
11  
12 The other is that the prevalence of overweight and obesity were relatively low in our  
13  
14 sample (6.17% and 1.10%, respectively) and the relationship between vomiting and  
15  
16 PTB in women with a high pre-pregnancy BMI needs to be further assessed.  
17  
18  
19

### 20 21 **Conclusion**

22  
23 This study showed that vomiting presented an increased risk for PTB based on a large  
24  
25 cohort study in China, although the effect was small. Vomiting was a risk for PTB in  
26  
27 women who were underweight and normal weight based on their pre-pregnancy BMI.  
28  
29 Although no significant association between vomiting and PTB in overweight and  
30  
31 obese women was observed, clinicians should give all women suitable guidance for  
32  
33 dealing with vomiting to ensure improved pregnancy outcomes. Finally, we recognize  
34  
35 the need for greater clarity with respect to the association between vomiting and PTB  
36  
37 and encourage researchers to build on our findings.  
38  
39  
40  
41  
42

### 43 44 **Acknowledgement**

45  
46 We are extremely grateful to all the families who took part in this study, the staff of  
47  
48 the Wuhan Health Bureau, and all the hospitals and community health centers  
49  
50 involved in this study.  
51  
52

### 53 54 **Ethics approval**

55  
56 The Institutional Review Board of Wuhan Medical and Healthcare Center for Women  
57  
58  
59  
60

1  
2  
3  
4 and Children received and approved this study (approved on 10/13/2016).

5  
6 **Funding**

7  
8 None.

9  
10  
11 **Patient consent**

12  
13 Obtained.

14  
15  
16 **Competing interests**

17  
18 None declared.

19  
20  
21 **Data sharing statement**

22  
23 No additional data are available.

24  
25  
26 **Contribution to authorship**

27  
28 RHH, YWC, BZ designed the research; YWC, YMZ, MZL analyzed data; RHH,  
29  
30 YWC, YL drafted the manuscript; ZMQ, MGW, SQX, TZZ, BZ revised the  
31  
32 manuscript.  
33  
34  
35  
36  
37  
38

39 **References**

- 40  
41 1. Flaxman SM, Sherman PW. Morning sickness: a mechanism for protecting mother and embryo. The  
42  
43 Quarterly review of biology 2000;**75**(2):113-48  
44  
45  
46 2. Koren G, Madjunkova S, Maltepe C. The protective effects of nausea and vomiting of pregnancy  
47  
48 against adverse fetal outcome--a systematic review. Reproductive toxicology 2014;**47**:77-80  
49  
50 doi: 10.1016/j.reprotox.2014.05.012[published Online First: Epub Date].  
51  
52  
53 3. Gadsby R, Barnie-Adshead AM, Jagger C. A prospective study of nausea and vomiting during  
54  
55 pregnancy. The British journal of general practice : the journal of the Royal College of  
56  
57  
58  
59  
60

- 1  
2  
3  
4  
5  
6  
7  
8  
9  
10  
11  
12  
13  
14  
15  
16  
17  
18  
19  
20  
21  
22  
23  
24  
25  
26  
27  
28  
29  
30  
31  
32  
33  
34  
35  
36  
37  
38  
39  
40  
41  
42  
43  
44  
45  
46  
47  
48  
49  
50  
51  
52  
53  
54  
55  
56  
57  
58  
59  
60
- General Practitioners 1993;**43**(371):245-8
4. Mazzotta P, Maltepe C, Navioz Y, Magee LA, Koren G. Attitudes, management and consequences of nausea and vomiting of pregnancy in the United States and Canada. *International journal of gynaecology and obstetrics: the official organ of the International Federation of Gynaecology and Obstetrics* 2000;**70**(3):359-65
5. Smith C, Crowther C, Beilby J, Dandeaux J. The impact of nausea and vomiting on women: a burden of early pregnancy. *The Australian & New Zealand journal of obstetrics & gynaecology* 2000;**40**(4):397-401
6. Dodds L, Fell DB, Joseph KS, Allen VM, Butler B. Outcomes of pregnancies complicated by hyperemesis gravidarum. *Obstetrics and gynecology* 2006;**107**(2 Pt 1):285-92 doi: 10.1097/01.AOG.0000195060.22832.cd[published Online First: Epub Date]].
7. Einarson TR, Piwko C, Koren G. Quantifying the global rates of nausea and vomiting of pregnancy: a meta analysis. *Journal of population therapeutics and clinical pharmacology = Journal de la therapeutique des populations et de la pharamcologie clinique* 2013;**20**(2):e171-83
8. Koch KL, Frissora CL. Nausea and vomiting during pregnancy. *Gastroenterology clinics of North America* 2003;**32**(1):201-34, vi
9. Chortatos A, Haugen M, Iversen PO, et al. Pregnancy complications and birth outcomes among women experiencing nausea only or nausea and vomiting during pregnancy in the Norwegian Mother and Child Cohort Study. *BMC Pregnancy Childbirth* 2015;**15**:138 doi: 10.1186/s12884-015-0580-6[published Online First: Epub Date]].
10. Kallen B, Lundberg G, Aberg A. Relationship between vitamin use, smoking, and nausea and vomiting of pregnancy. *Acta obstetricia et gynecologica Scandinavica* 2003;**82**(10):916-20

- 1  
2  
3  
4 11. Einarson TR, Piwko C, Koren G. Prevalence of nausea and vomiting of pregnancy in the USA: a  
5  
6 meta analysis. *Journal of population therapeutics and clinical pharmacology = Journal de la*  
7  
8 *therapeutique des populations et de la pharmacologie clinique* 2013;**20**(2):e163-70  
9  
10
- 11 12. Chin RK. Antenatal complications and perinatal outcome in patients with nausea and  
12  
13 vomiting-complicated pregnancy. *European journal of obstetrics, gynecology, and*  
14  
15 *reproductive biology* 1989;**33**(3):215-9  
16  
17
- 18 13. Chan OK, Sahota DS, Leung TY, Chan LW, Fung TY, Lau TK. Nausea and vomiting in  
19  
20 health-related quality of life among Chinese pregnant women. *The Australian & New Zealand*  
21  
22 *journal of obstetrics & gynaecology* 2010;**50**(6):512-8 doi:  
23  
24 10.1111/j.1479-828X.2010.01216.x[published Online First: Epub Date]].  
25  
26
- 27 14. Birkeland E, Stokke G, Tangvik RJ, et al. Norwegian PUQE (Pregnancy-Unique Quantification of  
28  
29 Emesis and nausea) identifies patients with hyperemesis gravidarum and poor nutritional  
30  
31 intake: a prospective cohort validation study. *PloS one* 2015;**10**(4):e0119962 doi:  
32  
33 10.1371/journal.pone.0119962[published Online First: Epub Date]].  
34  
35
- 36 15. Roseboom TJ, Ravelli AC, van der Post JA, Painter RC. Maternal characteristics largely explain  
37  
38 poor pregnancy outcome after hyperemesis gravidarum. *European journal of obstetrics,*  
39  
40 *gynecology, and reproductive biology* 2011;**156**(1):56-9 doi:  
41  
42 10.1016/j.ejogrb.2011.01.010[published Online First: Epub Date]].  
43  
44
- 45 16. Chan RL, Olshan AF, Savitz DA, et al. Severity and duration of nausea and vomiting symptoms in  
46  
47 pregnancy and spontaneous abortion. *Human reproduction* 2010;**25**(11):2907-12 doi:  
48  
49 10.1093/humrep/deq260[published Online First: Epub Date]].  
50  
51
- 52 17. Paauw JD, Bierling S, Cook CR, Davis AT. Hyperemesis gravidarum and fetal outcome. *JPEN.*  
53  
54  
55  
56  
57  
58  
59  
60



- Journal of parenteral and enteral nutrition 2005;**29**(2):93-6
18. Temming L, Franco A, Istwan N, et al. Adverse pregnancy outcomes in women with nausea and vomiting of pregnancy. The journal of maternal-fetal & neonatal medicine : the official journal of the European Association of Perinatal Medicine, the Federation of Asia and Oceania Perinatal Societies, the International Society of Perinatal Obstet 2014;**27**(1):84-8 doi: 10.3109/14767058.2013.806473[published Online First: Epub Date]].
19. Zhang J, Cai WW. Severe vomiting during pregnancy: antenatal correlates and fetal outcomes. Epidemiology 1991;**2**(6):454-7
20. Czeizel AE, Puho E. Association between severe nausea and vomiting in pregnancy and lower rate of preterm births. Paediatric and perinatal epidemiology 2004;**18**(4):253-9 doi: 10.1111/j.1365-3016.2004.00568.x[published Online First: Epub Date]].
21. Zhou A, Xiong C, Hu R, et al. Pre-Pregnancy BMI, Gestational Weight Gain, and the Risk of Hypertensive Disorders of Pregnancy: A Cohort Study in Wuhan, China. PloS one 2015;**10**(8):e0136291 doi: 10.1371/journal.pone.0136291[published Online First: Epub Date]].
22. Wang Y, Mi J, Shan XY, Wang QJ, Ge KY. Is China facing an obesity epidemic and the consequences? The trends in obesity and chronic disease in China. International journal of obesity (2005) 2007;**31**(1):177-88 doi: 10.1038/sj.ijo.0803354[published Online First: Epub Date]].
23. Shaw GM, Wise PH, Mayo J, et al. Maternal prepregnancy body mass index and risk of spontaneous preterm birth. Paediatric and perinatal epidemiology 2014;**28**(4):302-11 doi: 10.1111/ppe.12125[published Online First: Epub Date]].
24. Vikanes AV, Stoer NC, Magnus P, Grjibovski AM. Hyperemesis gravidarum and pregnancy

- 1  
2  
3  
4 outcomes in the Norwegian Mother and Child Cohort - a cohort study. BMC pregnancy and  
5  
6 childbirth 2013;**13**:169 doi: 10.1186/1471-2393-13-169[published Online First: Epub Date]].  
7  
8  
9 25. Klebanoff MA, Koslowe PA, Kaslow R, Rhoads GG. Epidemiology of vomiting in early pregnancy.  
10  
11 Obstetrics and gynecology 1985;**66**(5):612-6  
12  
13  
14 26. Tierson FD, Olsen CL, Hook EB. Nausea and vomiting of pregnancy and association with  
15  
16 pregnancy outcome. American journal of obstetrics and gynecology 1986;**155**(5):1017-22  
17  
18  
19 27. Naumann CR, Zelig C, Napolitano PG, Ko CW. Nausea, vomiting, and heartburn in pregnancy: a  
20  
21 prospective look at risk, treatment, and outcome. The journal of maternal-fetal & neonatal  
22  
23 medicine : the official journal of the European Association of Perinatal Medicine, the  
24  
25 Federation of Asia and Oceania Perinatal Societies, the International Society of Perinatal  
26  
27 Obstet 2012;**25**(8):1488-93 doi: 10.3109/14767058.2011.644363[published Online First: Epub  
28  
29 Date]].  
30  
31  
32  
33  
34 28. Laopaiboon M, Lumbiganon P, Intarut N, et al. Advanced maternal age and pregnancy outcomes: a  
35  
36 multicountry assessment. BJOG : an international journal of obstetrics and gynaecology  
37  
38 2014;**121 Suppl 1**:49-56 doi: 10.1111/1471-0528.12659[published Online First: Epub Date]].  
39  
40  
41 29. Araya BM, Diaz M, Paredes D, Ortiz J. Association between preterm birth and its subtypes and  
42  
43 maternal sociodemographic characteristics during the post-transitional phase in a developing  
44  
45 country with a very high human development index. Public health 2017;**147**:39-46 doi:  
46  
47 10.1016/j.puhe.2017.01.027[published Online First: Epub Date]].  
48  
49  
50  
51 30. Chen X, Scholl TO. Association of elevated free fatty acids during late pregnancy with preterm  
52  
53 delivery. Obstetrics and gynecology 2008;**112**(2 Pt 1):297-303 doi:  
54  
55 10.1097/AOG.0b013e3181802150[published Online First: Epub Date]].  
56  
57  
58  
59  
60

- 1  
2  
3  
4 31. Passini R, Jr., Cecatti JG, Lajos GJ, et al. Brazilian multicentre study on preterm birth (EMIP):  
5  
6 prevalence and factors associated with spontaneous preterm birth. PloS one  
7  
8 2014;**9**(10):e109069 doi: 10.1371/journal.pone.0109069[published Online First: Epub Date]].  
9  
10  
11 32. Ovalle A, Kakarieka E, Rencoret G, et al. [Risk factors for preterm deliveries in a public hospital].  
12  
13 Revista medica de Chile 2012;**140**(1):19-29 doi: /S0034-98872012000100003[published  
14  
15 Online First: Epub Date]].  
16  
17  
18 33. Goldenberg RL, Culhane JF, Iams JD, Romero R. Epidemiology and causes of preterm birth.  
19  
20 Lancet 2008;**371**(9606):75-84 doi: 10.1016/S0140-6736(08)60074-4[published Online First:  
21  
22 Epub Date]].  
23  
24  
25  
26 34. Veenendaal MV, van Abeelen AF, Painter RC, van der Post JA, Roseboom TJ. Consequences of  
27  
28 hyperemesis gravidarum for offspring: a systematic review and meta-analysis. BJOG : an  
29  
30 international journal of obstetrics and gynaecology 2011;**118**(11):1302-13 doi:  
31  
32 10.1111/j.1471-0528.2011.03023.x[published Online First: Epub Date]].  
33  
34  
35  
36 35. Schiff MA, Reed SD, Daling JR. The sex ratio of pregnancies complicated by hospitalisation for  
37  
38 hyperemesis gravidarum. BJOG : an international journal of obstetrics and gynaecology  
39  
40 2004;**111**(1):27-30  
41  
42  
43  
44 36. Lee J-I, Lee J-A, Lim H-S. Morning sickness reduces dietary diversity, nutrient intakes, and infant  
45  
46 outcome of pregnant women. Nutrition Research 2004;**24**(7):531-40 doi:  
47  
48 10.1016/j.nutres.2003.10.011[published Online First: Epub Date]].  
49  
50  
51 37. Jarnfelt-Samsioe A, Eriksson B, Waldenstrom J, Samsioe G. Some new aspects on emesis  
52  
53 gravidarum. Relations to clinical data, serum electrolytes, total protein and creatinine.  
54  
55 Gynecologic and obstetric investigation 1985;**19**(4):174-86  
56  
57  
58  
59  
60

- 1  
2  
3  
4 38. Haugen M, Vikanes A, Brantsaeter AL, Meltzer HM, Grjibovski AM, Magnus P. Diet before  
5 pregnancy and the risk of hyperemesis gravidarum. *The British journal of nutrition*  
6 2011;**106**(4):596-602 doi: 10.1017/s0007114511000675[published Online First: Epub Date]].  
7  
8  
9  
10  
11 39. Huxley RR. Nausea and vomiting in early pregnancy: its role in placental development. *Obstetrics*  
12 and gynecology 2000;**95**(5):779-82  
13  
14  
15 40. Girsen AI, Mayo JA, Carmichael SL, et al. Women's prepregnancy underweight as a risk factor for  
16 preterm birth: a retrospective study. *BJOG : an international journal of obstetrics and*  
17 gynaecology 2016;**123**(12):2001-07 doi: 10.1111/1471-0528.14027[published Online First:  
18 Epub Date]].  
19  
20  
21  
22  
23  
24  
25 41. Pan Y, Zhang S, Wang Q, et al. Investigating the association between prepregnancy body mass  
26 index and adverse pregnancy outcomes: a large cohort study of 536 098 Chinese pregnant  
27 women in rural China. *BMJ open* 2016;**6**(6):e011227 doi:  
28 10.1136/bmjopen-2016-011227[published Online First: Epub Date]].  
29  
30  
31  
32  
33  
34  
35 42. Koren G, Maltepe C, Navioz Y, Wolpin J. Recall bias of the symptoms of nausea and vomiting of  
36 pregnancy. *American journal of obstetrics and gynecology* 2004;**190**(2):485-8 doi:  
37 10.1016/j.ajog.2003.08.039[published Online First: Epub Date].  
38  
39  
40  
41  
42  
43  
44  
45  
46  
47  
48  
49  
50  
51  
52  
53  
54  
55  
56  
57  
58  
59  
60

1  
2  
3  
4  
5  
6  
7  
8  
9  
10  
11  
12  
13  
14  
15  
16  
17  
18  
19  
20  
21  
22  
23  
24  
25  
26  
27  
28  
29  
30  
31  
32  
33  
34  
35  
36  
37  
38  
39  
40  
41  
42  
43  
44  
45  
46  
47  
48  
49  
50  
51  
52  
53  
54  
55  
56  
57  
58  
59  
60

### Figure legends

Figure 1. Flow chart of population selection

For peer review only

1  
2  
3  
4  
5  
6  
7  
8  
9  
10  
11  
12  
13  
14  
15  
16  
17  
18  
19  
20  
21  
22  
23  
24  
25  
26  
27  
28  
29  
30  
31  
32  
33  
34  
35  
36  
37  
38  
39  
40  
41  
42  
43  
44  
45  
46  
47  
48  
49  
50  
51  
52  
53  
54  
55  
56  
57  
58  
59  
60



269x190mm (300 x 300 DPI)

ew only

Table S1 Odds ratios (ORs) and 95% confidence intervals (CIs) for preterm birth in relation to maternal and infants' characteristics

|                        | Pre-term<br>n (%) | Full-term<br>n (%) | Unadjusted<br>OR (95% CI) | <i>P</i> | Adjusted<br>OR (95% CI)* | <i>P</i> * |
|------------------------|-------------------|--------------------|---------------------------|----------|--------------------------|------------|
| <b>Age at delivery</b> |                   |                    |                           |          |                          |            |
| <25                    | 3091 (3.62)       | 82224 (96.38)      | 0.69(0.66,0.72)           | <0.001   | 0.79(0.76,0.83)          | <0.001     |
| 25~34                  | 11055 (5.17)      | 202692 (94.83)     | 1.00(Reference)           |          | 1.00(Reference)          |            |
| ≥35                    | 1743 (9.47)       | 16658 (90.53)      | 1.93(1.83,2.03)           | <0.001   | 1.69(1.59,1.78)          | <0.001     |
| <b>Education level</b> |                   |                    |                           |          |                          |            |
| Less than high school  | 3519 (4.55)       | 73737 (95.45)      | 0.97(0.925,1.01)          | 0.1339   | 0.91(0.87,0.95)          | <0.001     |
| High school            | 5010 (4.71)       | 101458 (95.29)     | 1.00(Reference)           |          | 1.00(Reference)          |            |
| College                | 7360 (5.50)       | 126379 (94.50)     | 1.18(1.14,1.22)           | <0.001   | 1.16(1.12,1.21)          | <0.001     |
| <b>Offspring sex</b>   |                   |                    |                           |          |                          |            |
| Male                   | 9188 (5.41)       | 160671 (94.59)     | 1.00(Reference)           |          | 1.00(Reference)          |            |
| Female                 | 6701 (4.54)       | 140903 (95.46)     | 0.83(0.81,0.86)           | <0.001   | 0.84(0.82,0.87)          | <0.001     |
| <b>Parity</b>          |                   |                    |                           |          |                          |            |
| Nullipara              | 11948 (4.65)      | 245121 (95.35)     | 1.00(Reference)           |          | 1.00(Reference)          |            |
| Multipara              | 3941 (6.55)       | 56453 (93.47)      | 1.4(1.38,1.49)            | <0.001   | 1.14(1.09,1.20)          | <0.001     |

**Gravidity**

|    |              |                |                 |        |                  |        |
|----|--------------|----------------|-----------------|--------|------------------|--------|
| <3 | 11471 (4.59) | 238259 (95.41) | 1.00(Reference) |        | 1.00(Reference)  |        |
| ≥3 | 4418 (6.52)  | 63315 (93.48)  | 1.45(1.40,1.50) | <0.001 | 1.211(1.16,1.27) | <0.001 |

**Pre-pregnancy**

**BMI(kg/m<sup>2</sup>)**

|                      |              |                |                 |        |                 |        |
|----------------------|--------------|----------------|-----------------|--------|-----------------|--------|
| Under weight (<18.5) | 3118 (4.21)  | 70916 (95.79)  | 0.83(0.80,0.86) | <0.001 | 0.90(0.86,0.94) | <0.001 |
| Normal (18.5~23.9)   | 11083 (5.03) | 209246 (94.97) | 1.00(Reference) |        | 1.00(Reference) |        |
| Overweight(24~27.9)  | 1360 (6.94)  | 18226 (93.06)  | 1.41(1.33,1.50) | <0.001 | 1.32(1.25,1.40) | <0.001 |
| Obese(≥28)           | 328 (9.33)   | 3186 (90.67)   | 1.96(1.75,2.20) | <0.001 | 1.86,1.66,2.09) | <0.001 |

**Vomiting**

|     |              |                |                  |        |                  |        |
|-----|--------------|----------------|------------------|--------|------------------|--------|
| Yes | 4978 (5.25)  | 89879 (94.75)  | 1.08(1.04, 1.11) |        | 1.05(1.02, 1.09) |        |
| No  | 10911 (4.90) | 211695 (95.10) | 1.00(Reference)  | <0.001 | 1.00(Reference)  | 0.0048 |

\* Age at delivery, educational level, offspring sex, parity, gravidity, pre-pregnancy BMI, and vomiting in the first trimester were mutually adjusted.



STROBE Statement—Checklist of items that should be included in reports of *cohort studies*

|                              | Item No | Recommendation                                                                                                                                                                                    | No. of Page |
|------------------------------|---------|---------------------------------------------------------------------------------------------------------------------------------------------------------------------------------------------------|-------------|
| <b>Title and abstract</b>    | 1       | (a) Indicate the study's design with a commonly used term in the title or the abstract                                                                                                            | 1           |
|                              |         | (b) Provide in the abstract an informative and balanced summary of what was done and what was found                                                                                               | 2-3         |
| <b>Introduction</b>          |         |                                                                                                                                                                                                   |             |
| Background/rationale         | 2       | Explain the scientific background and rationale for the investigation being reported                                                                                                              | 4-5         |
| Objectives                   | 3       | State specific objectives, including any prespecified hypotheses                                                                                                                                  | 5           |
| <b>Methods</b>               |         |                                                                                                                                                                                                   |             |
| Study design                 | 4       | Present key elements of study design early in the paper                                                                                                                                           | 6           |
| Setting                      | 5       | Describe the setting, locations, and relevant dates, including periods of recruitment, exposure, follow-up, and data collection                                                                   | 6           |
| Participants                 | 6       | (a) Give the eligibility criteria, and the sources and methods of selection of participants. Describe methods of follow-up                                                                        | 6           |
|                              |         | (b) For matched studies, give matching criteria and number of exposed and unexposed                                                                                                               | 6           |
| Variables                    | 7       | Clearly define all outcomes, exposures, predictors, potential confounders, and effect modifiers. Give diagnostic criteria, if applicable                                                          | 6           |
| Data sources/<br>measurement | 8*      | For each variable of interest, give sources of data and details of methods of assessment (measurement). Describe comparability of assessment methods if there is more than one group              | 6-7         |
| Bias                         | 9       | Describe any efforts to address potential sources of bias                                                                                                                                         | 6           |
| Study size                   | 10      | Explain how the study size was arrived at                                                                                                                                                         | 6           |
| Quantitative variables       | 11      | Explain how quantitative variables were handled in the analyses. If applicable, describe which groupings were chosen and why                                                                      | 7           |
| Statistical methods          | 12      | (a) Describe all statistical methods, including those used to control for confounding                                                                                                             | 7           |
|                              |         | (b) Describe any methods used to examine subgroups and interactions                                                                                                                               | 7           |
|                              |         | (c) Explain how missing data were addressed                                                                                                                                                       | 6           |
|                              |         | (d) If applicable, explain how loss to follow-up was addressed                                                                                                                                    | NR          |
|                              |         | (e) Describe any sensitivity analyses                                                                                                                                                             | NR          |
| <b>Results</b>               |         |                                                                                                                                                                                                   |             |
| Participants                 | 13*     | (a) Report numbers of individuals at each stage of study—eg numbers potentially eligible, examined for eligibility, confirmed eligible, included in the study, completing follow-up, and analysed | 7-8         |
|                              |         | (b) Give reasons for non-participation at each stage                                                                                                                                              | 8           |
|                              |         | (c) Consider use of a flow diagram                                                                                                                                                                | 7           |
| Descriptive data             | 14*     | (a) Give characteristics of study participants (eg demographic, clinical, social) and information on exposures and potential confounders                                                          | 7-8         |
|                              |         | (b) Indicate number of participants with missing data for each variable of interest                                                                                                               | 8           |
|                              |         | (c) Summarise follow-up time (eg, average and total amount)                                                                                                                                       | 8           |
| Outcome data                 | 15*     | Report numbers of outcome events or summary measures over time                                                                                                                                    | 7-8         |
| Main results                 | 16      | (a) Give unadjusted estimates and, if applicable, confounder-adjusted estimates and their precision (eg, 95% confidence interval). Make clear                                                     | 8-9         |

|    |                          |                                                                                 |       |
|----|--------------------------|---------------------------------------------------------------------------------|-------|
| 1  |                          | which confounders were adjusted for and why they were included                  |       |
| 2  |                          | (b) Report category boundaries when continuous variables were                   | 8     |
| 3  |                          | categorized                                                                     |       |
| 4  |                          | (c) If relevant, consider translating estimates of relative risk into absolute  | 9     |
| 5  |                          | risk for a meaningful time period                                               |       |
| 6  |                          |                                                                                 |       |
| 7  | Other analyses           | 17 Report other analyses done—eg analyses of subgroups and interactions,        | 9     |
| 8  |                          | and sensitivity analyses                                                        |       |
| 9  |                          |                                                                                 |       |
| 10 | <b>Discussion</b>        |                                                                                 |       |
| 11 | Key results              | 18 Summarise key results with reference to study objectives                     | 10-11 |
| 12 | Limitations              | 19 Discuss limitations of the study, taking into account sources of potential   |       |
| 13 |                          | bias or imprecision. Discuss both direction and magnitude of any potential      |       |
| 14 |                          | bias                                                                            |       |
| 15 |                          |                                                                                 |       |
| 16 | Interpretation           | 20 Give a cautious overall interpretation of results considering objectives,    | 12    |
| 17 |                          | limitations, multiplicity of analyses, results from similar studies, and other  |       |
| 18 |                          | relevant evidence                                                               |       |
| 19 |                          |                                                                                 |       |
| 20 | Generalisability         | 21 Discuss the generalisability (external validity) of the study results        | 12    |
| 21 |                          |                                                                                 |       |
| 22 | <b>Other information</b> |                                                                                 |       |
| 23 | Funding                  | 22 Give the source of funding and the role of the funders for the present study | 13    |
| 24 |                          | and, if applicable, for the original study on which the present article is      |       |
| 25 |                          | based                                                                           |       |
| 26 |                          |                                                                                 |       |

\*Give information separately for exposed and unexposed groups.

**Note:** An Explanation and Elaboration article discusses each checklist item and gives methodological background and published examples of transparent reporting. The STROBE checklist is best used in conjunction with this article (freely available on the Web sites of PLoS Medicine at <http://www.plosmedicine.org/>, Annals of Internal Medicine at <http://www.annals.org/>, and Epidemiology at <http://www.epidem.com/>). Information on the STROBE Initiative is available at <http://www.strobe-statement.org>.
