# Supplementary material for: Association between vomiting in the first trimester and preterm birth: a retrospective birth cohort study in Wuhan, China
Source: PubMed Central journal article supplement — BMJ Open. 2017 Sep 27;7(9):e017309. doi: 10.1136/bmjopen-2017-017309 (PMC5623485; doi:10.1136/bmjopen-2017-017309), 2017-09-27
Supplement: bmjopen-2017-017309supp001.pdf [file bmjopen-2017-017309supp001.pdf]

**Table S1 Odds ratios (ORs) and 95% confidence intervals (CIs) for preterm birth in relation to maternal and infants' characteristics**

|                        | Pre-term<br>n (%) | Full-term<br>n (%) | Unadjusted<br>OR (95% CI) | <i>P</i> | Adjusted<br>OR (95% CI)* | <i>P</i> * |
|------------------------|-------------------|--------------------|---------------------------|----------|--------------------------|------------|
| <b>Age at delivery</b> |                   |                    |                           |          |                          |            |
| <25                    | 3091 (3.62)       | 82224 (96.38)      | 0.69(0.66,0.72)           | <0.001   | 0.79(0.76,0.83)          | <0.001     |
| 25~34                  | 11055 (5.17)      | 202692 (94.83)     | 1.00(Reference)           |          | 1.00(Reference)          |            |
| ≥35                    | 1743 (9.47)       | 16658 (90.53)      | 1.93(1.83,2.03)           | <0.001   | 1.69(1.59,1.78)          | <0.001     |
| <b>Education level</b> |                   |                    |                           |          |                          |            |
| Less than high school  | 3519 (4.55)       | 73737 (95.45)      | 0.97(0.925,1.01)          | 0.1339   | 0.91(0.87,0.95)          | <0.001     |
| High school            | 5010 (4.71)       | 101458 (95.29)     | 1.00(Reference)           |          | 1.00(Reference)          |            |
| College                | 7360 (5.50)       | 126379 (94.50)     | 1.18(1.14,1.22)           | <0.001   | 1.16(1.12,1.21)          | <0.001     |
| <b>Offspring sex</b>   |                   |                    |                           |          |                          |            |
| Male                   | 9188 (5.41)       | 160671 (94.59)     | 1.00(Reference)           |          | 1.00(Reference)          |            |
| Female                 | 6701 (4.54)       | 140903 (95.46)     | 0.83(0.81,0.86)           | <0.001   | 0.84(0.82,0.87)          | <0.001     |
| <b>Parity</b>          |                   |                    |                           |          |                          |            |
| Nullipara              | 11948 (4.65)      | 245121 (95.35)     | 1.00(Reference)           |          | 1.00(Reference)          |            |
| Multipara              | 3941 (6.55)       | 56453 (93.47)      | 1.4(1.38,1.49)            | <0.001   | 1.14(1.09,1.20)          | <0.001     |

**Gravidity**

|    |              |                |                 |        |                  |        |
|----|--------------|----------------|-----------------|--------|------------------|--------|
| <3 | 11471 (4.59) | 238259 (95.41) | 1.00(Reference) |        | 1.00(Reference)  |        |
| ≥3 | 4418 (6.52)  | 63315 (93.48)  | 1.45(1.40,1.50) | <0.001 | 1.211(1.16,1.27) | <0.001 |

**Pre-pregnancy****BMI(kg/m<sup>2</sup>)**

|                      |              |                |                 |        |                 |        |
|----------------------|--------------|----------------|-----------------|--------|-----------------|--------|
| Under weight (<18.5) | 3118 (4.21)  | 70916 (95.79)  | 0.83(0.80,0.86) | <0.001 | 0.90(0.86,0.94) | <0.001 |
| Normal (18.5~23.9)   | 11083 (5.03) | 209246 (94.97) | 1.00(Reference) |        | 1.00(Reference) |        |
| Overweight(24~27.9)  | 1360 (6.94)  | 18226 (93.06)  | 1.41(1.33,1.50) | <0.001 | 1.32(1.25,1.40) | <0.001 |
| Obese(≥28)           | 328 (9.33)   | 3186 (90.67)   | 1.96(1.75,2.20) | <0.001 | 1.86,1.66,2.09) | <0.001 |

**Vomiting**

|     |              |                |                  |        |                  |        |
|-----|--------------|----------------|------------------|--------|------------------|--------|
| Yes | 4978 (5.25)  | 89879 (94.75)  | 1.08(1.04, 1.11) |        | 1.05(1.02, 1.09) |        |
| No  | 10911 (4.90) | 211695 (95.10) | 1.00(Reference)  | <0.001 | 1.00(Reference)  | 0.0048 |

---

\* Age at delivery, educational level, offspring sex, parity, gravidity, pre-pregnancy BMI, and vomiting in the first trimester were mutually adjusted.
